# Supplementary material for: The Transcription Unit Architecture of Streptomyces lividans TK24
Source: Front Microbiol. 2019 Sep 6;10:2074. doi: 10.3389/fmicb.2019.02074 (PMC6742748; doi:10.3389/fmicb.2019.02074)
Supplement: Supplementary file 5 [file Table_4.XLSX]

## Sheet: Sheet1
	Supplementary Dataset 1. TSSs identified from dRNA-Seq.
	Position	Intensity	Strand	Category	Associated gene
	53357	7.14	+	P	SLIV_00245
	57652	-6.85	-	P	SLIV_00265
	60388	3.15	+	P	SLIV_00280
	62870	4.96	+	P	SLIV_00295
	68305	-3.15	-	P	SLIV_00320
	68321	21.31	+	P	SLIV_00325
	70153	10.97	+	P	SLIV_00335
	80565	-68.85	-	P	SLIV_00395
	82311	-9.45	-	P	SLIV_00400
	84012	-4.2	-	P	SLIV_00410
	87305	-9.96	-	P	SLIV_00430
	88885	-24.28	-	P	SLIV_00440
	90614	12.45	+	P	SLIV_00450
	92267	34.24	+	P	SLIV_00465
	93201	69.635	+	N	-
	98169	-43.27	-	P	SLIV_00495
	102006	-42.64	-	P	SLIV_00510
	102579	3.74	+	A	SLIV_00515
	106083	-8.87	-	P	SLIV_00530
	107184	-48.46	-	P	SLIV_00535
	107652	-54.225	-	P	SLIV_00540
	107687	5.25	+	P	SLIV_00545
	114186	-1.87	-	P	SLIV_00575
	116750	-17.83	-	P	SLIV_00590
	129698	-20.145	-	P	SLIV_00650
	130978	-13.39	-	P	SLIV_00660
	131105	97.58	+	P	SLIV_00665
	141712	15.515	+	P	SLIV_00720
	144328	-3.15	-	P	SLIV_00735
	148717	-29.39	-	P	SLIV_00755
	152796	-8.44	-	P	SLIV_00780
	158695	-7.935	-	P	SLIV_00805
	161507	-12.45	-	P	SLIV_00815
	162081	-10.5	-	P	SLIV_00820
	163151	-31.49	-	P	SLIV_00830
	201377	-15.59	-	P	SLIV_00960
	206834	38.675	+	P	SLIV_00995
	209468	-25.19	-	P	SLIV_01010
	213554	3.285	+	A	SLIV_01030
	214092	-5.25	-	P	SLIV_01030
	215388	-12.11	-	I	SLIV_01040
	216703	-11.55	-	P	SLIV_01045
	218308	-20.965	-	P	SLIV_01055
	223215	-2.49	-	P	SLIV_01080
	223775	-20.145	-	P	SLIV_01085
	229563	4.2	+	P	SLIV_01125
	235837	-3.15	-	P	SLIV_01145
	237859	-9.45	-	P	SLIV_01155
	241964	-2.8	-	P	SLIV_01170
	255013	-13.07	-	P	SLIV_01240
	260793	5.25	+	P	SLIV_01270
	261954	-19.415	-	P	SLIV_01275
	264405	-7.35	-	P	SLIV_01285
	266892	-4.05	-	P	SLIV_01295
	268702	-4.98	-	P	SLIV_01305
	283405	3.15	+	P	SLIV_01370
	287097	61.985	+	P	SLIV_01385
	290160	4.05	+	P	SLIV_01400
	294038	-10.575	-	P	SLIV_01410
	294173	-6.105	-	S	SLIV_01410
	295004	-11.41	-	P	SLIV_01415
	299674	9.65	+	P	SLIV_01445
	303024	-7.76	-	P	SLIV_01450
	311810	46.18	+	P	SLIV_01500
	332346	3.15	+	P	SLIV_01600
	336013	95.545	+	P	SLIV_01610
	345389	-30.44	-	P	SLIV_01645
	367941	-50.12	-	P	SLIV_01730
	372562	258.105	+	P	SLIV_01760
	375628	6.3	+	P	SLIV_01775
	382129	4.2	+	P	SLIV_01800
	388945	-12.59	-	P	SLIV_01825
	403403	367.34	+	P	SLIV_01900
	405909	4.98	+	P	SLIV_01915
	414827	-55.18	-	P	SLIV_01955
	416896	41.98	+	P	SLIV_01970
	419595	-6.01	-	P	SLIV_01975
	422404	-300.725	-	P	SLIV_01995
	429747	87.29	+	P	SLIV_02045
	438477	-11.82	-	P	SLIV_02080
	442433	-24.79	-	P	SLIV_02095
	443788	6.3	+	P	SLIV_02110
	451830	-9.65	-	P	SLIV_02140
	457212	-11.69	-	P	SLIV_02175
	460059	-17.84	-	P	SLIV_02190
	471975	-5.25	-	P	SLIV_02250
	481700	25.51	+	P	SLIV_02290
	484840	11.55	+	P	SLIV_02310
	493045	16.79	+	P	SLIV_02340
	503426	-6.555	-	P	SLIV_02395
	519670	-6.3	-	P	SLIV_02475
	524520	-4.2	-	P	SLIV_02500
	524630	33.305	+	P	SLIV_02505
	537320	-5.6	-	P	SLIV_02560
	542501	-11.14	-	P	SLIV_02585
	559020	14.17	+	P	SLIV_02655
	559663	4.2	+	P	SLIV_02660
	566849	5.795	+	P	SLIV_02675
	578146	-108.24	-	P	SLIV_02725
	582728	-6.3	-	P	SLIV_02750
	588386	4.05	+	P	SLIV_02790
	591332	-5.29	-	P	SLIV_02800
	599463	51.43	+	P	SLIV_02830
	606556	-404.99	-	P	SLIV_02865
	608632	-4.55	-	P	SLIV_02875
	612187	73.555	+	S	SLIV_02905
	612231	744.56	+	P	SLIV_02905
	613679	-25.42	-	P	SLIV_02910
	619517	6.79	+	P	SLIV_02950
	627843	19.92	+	P	SLIV_03005
	632275	4.36	+	P	SLIV_03025
	633605	15.725	+	P	SLIV_03030
	636499	-11.21	-	P	SLIV_03035
	636620	4.05	+	P	SLIV_03040
	642618	-240.355	-	P	SLIV_03065
	678648	-36.73	-	P	SLIV_03215
	678771	4.375	+	P	SLIV_03220
	687717	-1430.52	-	P	SLIV_03250
	691864	-5.29	-	P	SLIV_03275
	693433	3.74	+	P	SLIV_03290
	696656	-3.19	-	A	SLIV_03300
	697934	11.195	+	P	SLIV_03310
	702026	-45.4	-	P	SLIV_03325
	702226	31.825	+	P	SLIV_03330
	712640	-3.42	-	P	SLIV_03360
	724834	11.55	+	N	-
	727991	-21.815	-	P	SLIV_03415
	728472	-24.705	-	P	SLIV_03420
	728629	25.19	+	P	SLIV_03425
	732812	-12.73	-	P	SLIV_03435
	758508	-16.05	-	P	SLIV_03545
	763495	-32.875	-	P	SLIV_03565
	767268	13.64	+	P	SLIV_03590
	774186	-4.2	-	P	SLIV_03605
	777524	-4.2	-	P	SLIV_03625
	789040	7.565	+	A	SLIV_03675
	797228	9.375	+	P	SLIV_03715
	805385	-7.195	-	P	SLIV_03755
	817653	-5.29	-	P	SLIV_03810
	825304	96.83	+	P	SLIV_03840
	827558	3.15	+	P	SLIV_03855
	829845	-73.05	-	I	SLIV_03865
	831142	19.61	+	P	SLIV_03870
	835721	-10.135	-	P	SLIV_03880
	836405	3.445	+	P	SLIV_03890
	842262	-7.35	-	P	SLIV_03920
	849364	3.11	+	P	SLIV_03945
	855433	15.97	+	P	SLIV_03985
	862447	-8.09	-	P	SLIV_04015
	864200	-4.2	-	P	SLIV_04035
	865205	-5.25	-	P	SLIV_04045
	867267	9.45	+	P	SLIV_04055
	887440	8.4	+	P	SLIV_04120
	899524	-39.18	-	P	SLIV_04155
	899901	-4.36	-	S	SLIV_04155
	900075	2.1	+	P	SLIV_04160
	902388	8.4	+	P	SLIV_04170
	922153	-3.15	-	P	SLIV_04225
	922291	3.15	+	P	SLIV_04230
	926240	291.1	+	P	SLIV_04245
	933473	4.2	+	P	SLIV_04275
	948497	-33.915	-	P	SLIV_04330
	952657	-5.25	-	P	SLIV_04350
	952801	3.42	+	P	SLIV_04355
	959712	6.23	+	P	SLIV_04395
	966401	4.2	+	P	SLIV_04420
	986363	-2.49	-	P	SLIV_04525
	988620	-4.2	-	P	SLIV_04545
	990645	-6.3	-	P	SLIV_04550
	993404	-4.2	-	P	SLIV_04560
	1003619	6.54	+	P	SLIV_04600
	1008787	17.36	+	P	SLIV_04625
	1011990	-5.25	-	P	SLIV_04635
	1013636	-4.2	-	P	SLIV_04645
	1015319	5.97	+	P	SLIV_04655
	1025584	-2.355	-	P	SLIV_04695
	1027137	175.65	+	A	SLIV_04705
	1030133	-68.11	-	P	SLIV_04720
	1032113	-11.55	-	P	SLIV_04730
	1035800	-14.94	-	P	SLIV_04750
	1037531	-14.01	-	P	SLIV_04755
	1038918	21.69	+	P	SLIV_04765
	1044078	107.34	+	P	SLIV_04800
	1049359	10.205	+	P	SLIV_04815
	1052271	-29.57	-	P	SLIV_04820
	1053858	7.16	+	P	SLIV_04830
	1057551	-5.29	-	P	SLIV_04840
	1057746	7.35	+	I	SLIV_04845
	1066415	-116.62	-	P	SLIV_04890
	1067800	8.4	+	P	SLIV_04900
	1074227	209.99	+	P	SLIV_04925
	1078368	29.39	+	N	-
	1085389	-21.635	-	P	SLIV_04965
	1087778	-11.55	-	P	SLIV_04975
	1098881	-5.29	-	P	SLIV_05030
	1100989	-21.17	-	P	SLIV_05040
	1101035	2.8	+	P	SLIV_05045
	1105084	-16.19	-	P	SLIV_05055
	1117997	-15.25	-	P	SLIV_05080
	1118390	25.23	+	P	SLIV_05085
	1125741	-6.3	-	P	SLIV_05105
	1125927	7.35	+	P	SLIV_05110
	1129407	9.41	+	P	SLIV_05135
	1130163	8.05	+	P	SLIV_05140
	1132177	-7.35	-	P	SLIV_05150
	1134851	-8.4	-	P	SLIV_05160
	1142656	-2.8	-	P	SLIV_05190
	1142717	77.145	+	P	SLIV_05195
	1142745	8.035	+	S	SLIV_05195
	1155797	-18.89	-	I	SLIV_05245
	1159954	-29.21	-	P	SLIV_05260
	1167221	-5.485	-	P	SLIV_05290
	1168356	670.1	+	N	-
	1170903	-151.7	-	P	SLIV_05310
	1175993	27.71	+	P	SLIV_05335
	1180954	-7.72	-	P	SLIV_05355
	1181363	-7.02	-	P	SLIV_05360
	1188457	-3.11	-	P	SLIV_05390
	1188562	36.06	+	P	SLIV_05395
	1196005	4.085	+	P	SLIV_05425
	1205738	14.63	+	P	SLIV_05455
	1215455	-8.475	-	P	SLIV_t05480
	1223017	-6.85	-	A	SLIV_05510
	1248696	-8.4	-	P	SLIV_05600
	1257194	3.11	+	P	SLIV_05640
	1267107	228.185	+	P	SLIV_05675
	1269784	-4.2	-	P	SLIV_05685
	1283727	9.45	+	P	SLIV_05740
	1292661	-33.59	-	P	SLIV_05770
	1299872	2.1	+	P	SLIV_05800
	1303821	-4.825	-	P	SLIV_05815
	1309504	-56.55	-	P	SLIV_05840
	1309635	20.26	+	P	SLIV_05845
	1315536	57.245	+	P	SLIV_05875
	1326836	-11.55	-	P	SLIV_05945
	1328661	11.18	+	P	SLIV_05960
	1331159	18.785	+	P	SLIV_05970
	1336583	-9.37	-	P	SLIV_05990
	1337251	-21.17	-	P	SLIV_05995
	1340911	-18.92	-	P	SLIV_06005
	1342405	3.13	+	A	SLIV_06010
	1344085	-32.445	-	P	SLIV_06015
	1345337	12.59	+	P	SLIV_06025
	1349098	-24.28	-	P	SLIV_06045
	1351541	6.145	+	I	SLIV_06055
	1358456	111.36	+	P	SLIV_06085
	1358829	31.515	+	S	SLIV_06085
	1361857	-18.89	-	P	SLIV_06095
	1361979	5.25	+	P	SLIV_06100
	1368471	6.3	+	P	SLIV_06130
	1373938	6.75	+	P	SLIV_06145
	1383742	6.67	+	P	SLIV_06190
	1386345	-9.45	-	P	SLIV_06200
	1392946	89.72	+	P	SLIV_06230
	1396085	-3.15	-	P	SLIV_06240
	1399823	-22.04	-	P	SLIV_06260
	1413608	-55.425	-	A	SLIV_06285
	1429711	24.16	+	A	SLIV_06345
	1434258	-17.74	-	P	SLIV_06360
	1438178	-19.89	-	P	SLIV_06375
	1438654	27.255	+	P	SLIV_06385
	1455210	6.945	+	P	SLIV_06435
	1459017	-9.525	-	P	SLIV_06450
	1460413	-9.45	-	P	SLIV_06455
	1462165	-4.705	-	A	SLIV_06470
	1475229	9.14	+	P	SLIV_06540
	1477837	3.11	+	P	SLIV_06555
	1480672	-12.7	-	P	SLIV_06570
	1483358	2.8	+	P	SLIV_06590
	1486126	-15.965	-	P	SLIV_06600
	1501597	-6.3	-	P	SLIV_06670
	1509583	3.11	+	P	SLIV_06715
	1512368	-60.64	-	P	SLIV_06725
	1513375	3.42	+	P	SLIV_06735
	1516239	-3.035	-	P	SLIV_06740
	1518022	-196.615	-	P	SLIV_06745
	1523817	-16.5	-	P	SLIV_06765
	1523948	65.855	+	P	SLIV_06770
	1557064	93.39	+	P	SLIV_06790
	1564226	4.36	+	A	SLIV_06815
	1564713	14.32	+	P	SLIV_06820
	1566446	-20.15	-	P	SLIV_06825
	1575312	3.695	+	A	SLIV_06855
	1586415	-3.15	-	P	SLIV_06910
	1586516	5.25	+	P	SLIV_06915
	1587719	-19.94	-	P	SLIV_06920
	1595246	10.37	+	P	SLIV_06960
	1615325	5.23	+	A	SLIV_07040
	1623894	-5.29	-	P	SLIV_07045
	1624031	144.965	+	P	SLIV_07050
	1625390	49.775	+	P	SLIV_07060
	1633629	-11.55	-	P	SLIV_07100
	1644007	3.42	+	A	SLIV_07145
	1647415	-10.465	-	P	SLIV_07145
	1647806	260.855	+	P	SLIV_07150
	1651938	2.1	+	P	SLIV_07165
	1652991	8.4	+	P	SLIV_07170
	1672244	4.2	+	P	SLIV_07245
	1672252	-3.15	-	P	SLIV_07240
	1673619	37.1	+	P	SLIV_07255
	1682509	3.15	+	P	SLIV_07290
	1695751	15.205	+	P	SLIV_07350
	1699192	-14.735	-	P	SLIV_07360
	1701014	-24.77	-	P	SLIV_07365
	1701218	4.2	+	P	SLIV_07370
	1707552	-26.775	-	P	SLIV_07395
	1711189	-8.4	-	P	SLIV_07410
	1711276	12.285	+	P	SLIV_07415
	1713186	7.35	+	P	SLIV_07430
	1724216	30.98	+	P	SLIV_07490
	1726853	2.1	+	P	SLIV_07505
	1730346	-3.11	-	P	SLIV_07530
	1753075	6.23	+	P	SLIV_07625
	1763418	12.59	+	P	SLIV_07685
	1773205	-15.765	-	P	SLIV_07720
	1781935	21.215	+	P	SLIV_07750
	1785990	4.2	+	P	SLIV_07765
	1789696	-24.735	-	P	SLIV_07775
	1792535	3.15	+	P	SLIV_07790
	1802040	-194.75	-	P	SLIV_07835
	1804018	-45.775	-	P	SLIV_07845
	1816762	131.335	+	P	SLIV_07915
	1821465	-86.765	-	P	SLIV_07930
	1822954	-3.11	-	P	SLIV_07935
	1824253	2.1	+	P	SLIV_07945
	1826081	-5.25	-	P	SLIV_07950
	1826163	3.11	+	P	SLIV_07955
	1835441	-16.215	-	I	SLIV_07990
	1835593	6.595	+	P	SLIV_07995
	1837448	3.15	+	P	SLIV_08005
	1838849	23.09	+	P	SLIV_08010
	1844281	5.6	+	A	SLIV_08020
	1851606	-13.825	-	P	SLIV_08040
	1865057	-608.82	-	P	SLIV_08090
	1870279	-19.3	-	P	SLIV_08110
	1870476	5.25	+	P	SLIV_08115
	1874445	26.46	+	P	SLIV_08120
	1876345	-111.41	-	P	SLIV_08135
	1879313	-1796.09	-	P	SLIV_08140
	1879437	-1219.43	-	S	SLIV_08140
	1881578	-61.705	-	N	-
	1884118	-242.605	-	P	SLIV_08155
	1884199	-3.445	-	S	SLIV_08155
	1885987	13.645	+	P	SLIV_08170
	1888769	-68.265	-	P	SLIV_08175
	1888793	20.34	+	P	SLIV_08180
	1895066	-22.44	-	A	SLIV_08210
	1900539	37.465	+	P	SLIV_08220
	1913016	7.47	+	P	SLIV_08290
	1916767	-64.465	-	P	SLIV_08300
	1933025	24	+	P	SLIV_08405
	1933380	27.58	+	P	SLIV_08410
	1941962	19.015	+	N	-
	1944345	-5.6	-	P	SLIV_08475
	1946487	-4.05	-	N	-
	1953963	-16.1	-	P	SLIV_08525
	1963727	-149.625	-	P	SLIV_08580
	1969792	-6.09	-	P	SLIV_08610
	1972018	-131.99	-	P	SLIV_08615
	1973977	3.74	+	P	SLIV_08630
	1980736	-6.595	-	P	SLIV_08660
	1983797	-11.55	-	P	SLIV_08685
	2003510	-18.37	-	P	SLIV_08760
	2006540	-24.375	-	P	SLIV_08780
	2013427	37.07	+	P	SLIV_08810
	2025263	-93.205	-	P	SLIV_08855
	2026137	-22.04	-	P	SLIV_08860
	2042961	-25.66	-	A	SLIV_08945
	2047568	-4.98	-	P	SLIV_08960
	2055842	22.755	+	P	SLIV_09000
	2059601	-17.385	-	P	SLIV_09020
	2061022	10.5	+	N	-
	2061518	-28572.5	-	N	-
	2072363	-10.5	-	P	SLIV_09075
	2074332	-132.595	-	A	SLIV_09080
	2101522	-2.1	-	P	SLIV_09165
	2101650	63.555	+	P	SLIV_09170
	2106984	380.12	+	P	SLIV_09200
	2113355	-3.74	-	P	SLIV_09220
	2113552	5.29	+	P	SLIV_09225
	2116351	-58.32	-	P	SLIV_09240
	2124401	-358.46	-	P	SLIV_09285
	2124526	-169.415	-	S	SLIV_09285
	2133300	-205.995	-	P	SLIV_09325
	2133476	61.64	+	P	SLIV_09330
	2143408	-2.51	-	P	SLIV_09370
	2148231	-3.075	-	P	SLIV_09390
	2151169	403.4	+	P	SLIV_09400
	2151583	29.26	+	S	SLIV_09400
	2153863	-10.165	-	P	SLIV_09410
	2156850	-40.68	-	P	SLIV_09420
	2157057	16.06	+	P	SLIV_09425
	2160684	-14.275	-	P	SLIV_09430
	2161595	164.345	+	P	SLIV_09440
	2175040	-31.775	-	P	SLIV_09495
	2175093	-15.825	-	S	SLIV_09495
	2175194	798.365	+	S	SLIV_09500
	2175381	1507.32	+	P	SLIV_09500
	2178473	-42.92	-	P	SLIV_09510
	2186786	-7.35	-	P	SLIV_09535
	2190248	12.14	+	P	SLIV_09565
	2190700	-95.61	-	A	SLIV_09565
	2191825	-18.89	-	A	SLIV_09565
	2193706	-5.6	-	P	SLIV_09575
	2194434	-16.68	-	P	SLIV_09580
	2194529	515.295	+	P	SLIV_09585
	2198892	-57.9	-	P	SLIV_09595
	2199134	18.89	+	S	SLIV_09600
	2199387	66.12	+	P	SLIV_09600
	2206869	-4.2	-	P	SLIV_09620
	2207080	3.15	+	P	SLIV_09625
	2216523	-3.19	-	P	SLIV_09650
	2218131	-4.9	-	P	SLIV_09660
	2218211	4.36	+	P	SLIV_09665
	2221335	-50.125	-	P	SLIV_09680
	2224485	-7.35	-	P	SLIV_09695
	2224521	19.29	+	P	SLIV_09700
	2230428	112.57	+	P	SLIV_09730
	2239325	-7.955	-	P	SLIV_09770
	2239427	178.72	+	P	SLIV_09775
	2251401	-15.98	-	P	SLIV_09825
	2252976	-85.84	-	P	SLIV_09840
	2255688	-91.93	-	P	SLIV_09855
	2260685	-168.39	-	P	SLIV_09870
	2260864	-101.08	-	S	SLIV_09870
	2266805	-16.81	-	P	SLIV_09875
	2266812	37.78	+	P	SLIV_09880
	2270609	-209.045	-	P	SLIV_09890
	2280071	-498.8	-	P	SLIV_09920
	2280183	17.12	+	P	SLIV_09925
	2286765	-205.47	-	P	SLIV_09955
	2286873	227.6	+	P	SLIV_09960
	2289014	-12.02	-	P	SLIV_09965
	2289068	29.39	+	P	SLIV_09970
	2297537	-283.38	-	P	SLIV_09995
	2298592	-51.43	-	P	SLIV_10000
	2298611	474.585	+	P	SLIV_10005
	2306054	-26.215	-	S	SLIV_10030
	2306074	21.075	+	P	SLIV_10035
	2306120	-56.095	-	P	SLIV_10030
	2319338	-16.585	-	P	SLIV_10075
	2327606	-13.64	-	P	SLIV_10100
	2329298	-177.73	-	N	-
	2331011	-54.125	-	P	SLIV_10110
	2335717	-3.15	-	P	SLIV_10130
	2338707	-38.91	-	P	SLIV_10145
	2341402	-25.18	-	P	SLIV_10155
	2343562	2.8	+	P	SLIV_10165
	2358736	-9.03	-	P	SLIV_10210
	2363128	-3.74	-	P	SLIV_10230
	2367399	6.01	+	P	SLIV_10245
	2368920	17.005	+	N	-
	2370007	-10.5	-	P	SLIV_10250
	2373163	-19.94	-	P	SLIV_10265
	2382589	-10.5	-	P	SLIV_10310
	2382647	6.3	+	P	SLIV_10315
	2384584	-9.525	-	N	-
	2386384	-10.575	-	P	SLIV_10330
	2389243	-2.18	-	P	SLIV_10340
	2393767	4.98	+	P	SLIV_10365
	2402342	-6.23	-	P	SLIV_10400
	2407230	-255.665	-	P	SLIV_10415
	2408124	-805.7	-	P	SLIV_10420
	2410212	-9.45	-	P	SLIV_10430
	2411543	-11.83	-	P	SLIV_10440
	2416634	-8.56	-	S	SLIV_10465
	2416749	-9.65	-	P	SLIV_10465
	2419192	-213.98	-	P	SLIV_10480
	2421305	-2.45	-	S	SLIV_10495
	2421348	-233.365	-	P	SLIV_10495
	2423653	-16606.1	-	P	SLIV_10515
	2424378	-340.52	-	P	SLIV_10520
	2424970	4.98	+	P	SLIV_10525
	2436656	-243.63	-	P	SLIV_10560
	2436770	102.41	+	P	SLIV_10565
	2438954	9.45	+	P	SLIV_10575
	2438958	-313.435	-	P	SLIV_10570
	2442224	-42.59	-	P	SLIV_10580
	2445982	22.4	+	N	-
	2446082	-25.53	-	P	SLIV_10585
	2446540	-9.65	-	P	SLIV_10590
	2447072	-17.775	-	P	SLIV_10595
	2447145	8.985	+	P	SLIV_10600
	2448554	11.03	+	P	SLIV_10605
	2451667	-183.055	-	P	SLIV_10625
	2458319	10.175	+	P	SLIV_10655
	2460715	8.4	+	P	SLIV_10670
	2461101	-18.89	-	N	-
	2464291	-251.23	-	P	SLIV_10685
	2466381	-205.7	-	P	SLIV_10705
	2466475	-17.905	-	S	SLIV_10705
	2468823	-100.87	-	P	SLIV_10715
	2468895	6.3	+	P	SLIV_10720
	2470307	46.755	+	P	SLIV_10730
	2471644	-4.025	-	P	SLIV_t10755
	2472388	-15.825	-	P	SLIV_10760
	2475631	-57.69	-	P	SLIV_10780
	2475965	25.19	+	P	SLIV_10785
	2480532	-4.705	-	A	SLIV_10790
	2480951	11.37	+	P	SLIV_10800
	2481911	5.58	+	P	SLIV_10805
	2489352	-41.66	-	P	SLIV_10830
	2491610	7.78	+	P	SLIV_10840
	2497260	-6.3	-	P	SLIV_10860
	2504284	-5.29	-	P	SLIV_10890
	2508628	-7.78	-	P	SLIV_10910
	2510544	-76.31	-	P	SLIV_10920
	2513934	-133.885	-	P	SLIV_10930
	2522293	-29.39	-	P	SLIV_10955
	2522345	17.43	+	P	SLIV_10960
	2529235	-33.54	-	P	SLIV_10985
	2529911	-17.84	-	P	SLIV_10990
	2534118	-1219.07	-	P	SLIV_11005
	2535966	-15.79	-	P	SLIV_11015
	2544378	-9.03	-	P	SLIV_11050
	2544442	40.93	+	P	SLIV_11055
	2549512	12.59	+	P	SLIV_11090
	2558819	-14.895	-	P	SLIV_11125
	2561583	-3.11	-	P	SLIV_11140
	2561700	7.35	+	P	SLIV_11145
	2563215	80.745	+	P	SLIV_11150
	2568708	-26.77	-	P	SLIV_11170
	2568822	3.11	+	P	SLIV_11175
	2570131	-9.45	-	P	SLIV_11180
	2570505	-48.245	-	P	SLIV_11185
	2573551	-34.635	-	P	SLIV_11205
	2574429	-34.015	-	P	SLIV_11210
	2598373	-124.845	-	I	SLIV_11285
	2598524	8.4	+	P	SLIV_11290
	2608639	-54.175	-	P	SLIV_11310
	2609449	-7.37	-	P	SLIV_11320
	2611084	-5.91	-	P	SLIV_11325
	2616466	9.92	+	P	SLIV_11350
	2622835	-5.075	-	P	SLIV_11375
	2622905	12.945	+	P	SLIV_11380
	2626327	167.16	+	P	SLIV_11390
	2630883	-384.645	-	P	SLIV_11405
	2632176	-3.405	-	S	SLIV_11410
	2632347	-14.62	-	P	SLIV_11410
	2636986	-15.77	-	P	SLIV_11430
	2637421	-1136.2	-	P	SLIV_11435
	2638798	-5.64	-	P	SLIV_11450
	2638899	18.24	+	P	SLIV_11455
	2640980	97.06	+	P	SLIV_11470
	2643650	-11.83	-	P	SLIV_11480
	2648473	50.63	+	P	SLIV_11505
	2648575	-8.4	-	P	SLIV_11500
	2654391	112.355	+	P	SLIV_11520
	2656256	9.45	+	P	SLIV_11530
	2658999	28.015	+	P	SLIV_11545
	2660635	-38.905	-	P	SLIV_11550
	2660820	17.93	+	P	SLIV_11555
	2665850	-11.205	-	P	SLIV_11570
	2666590	-4.2	-	P	SLIV_11575
	2668250	4.36	+	P	SLIV_11590
	2669743	-14.01	-	P	SLIV_11595
	2682302	-6.3	-	P	SLIV_11660
	2683765	-29.995	-	P	SLIV_11665
	2688989	-22.04	-	P	SLIV_11695
	2690296	-15.74	-	P	SLIV_11700
	2696796	-16.14	-	P	SLIV_11720
	2700003	-45.94	-	P	SLIV_11735
	2701906	-12.59	-	P	SLIV_11750
	2703459	-7.645	-	P	SLIV_11760
	2723941	12.14	+	P	SLIV_11870
	2726543	39.13	+	P	SLIV_11885
	2734235	-9.45	-	P	SLIV_11915
	2734478	13.7	+	P	SLIV_11920
	2734720	-10.925	-	A	SLIV_11920
	2739392	-7.35	-	P	SLIV_11935
	2740281	19.3	+	P	SLIV_11945
	2742457	224.215	+	P	SLIV_11955
	2757757	-11.21	-	P	SLIV_11985
	2769018	10.5	+	P	SLIV_12025
	2769058	-24.14	-	P	SLIV_12020
	2770487	40.19	+	P	SLIV_12035
	2771412	12.945	+	P	SLIV_12040
	2773407	-37.74	-	P	SLIV_12050
	2774505	-2.1	-	P	SLIV_12055
	2776256	-3.74	-	P	SLIV_12060
	2776603	4.2	+	P	SLIV_12065
	2780000	-6.38	-	I	SLIV_12080
	2780390	-39.79	-	P	SLIV_12080
	2781422	-6.3	-	P	SLIV_12090
	2781513	2378.86	+	P	SLIV_12095
	2782905	-20.23	-	P	SLIV_12105
	2783642	-6.69	-	P	SLIV_12110
	2786628	-4646.42	-	P	SLIV_12120
	2786822	275.95	+	P	SLIV_12125
	2790167	111.455	+	P	SLIV_12140
	2790607	35.135	+	P	SLIV_12145
	2793896	190.38	+	P	SLIV_12165
	2803994	-4.36	-	P	SLIV_12205
	2804290	2.1	+	P	SLIV_12210
	2805206	15.74	+	P	SLIV_12215
	2807777	5.25	+	P	SLIV_12230
	2811622	-43.39	-	P	SLIV_12240
	2815233	-10.5	-	P	SLIV_12255
	2816130	-57.195	-	P	SLIV_12260
	2821001	-113.93	-	I	SLIV_12285
	2821176	-32.37	-	P	SLIV_12285
	2822692	-118.91	-	P	SLIV_12295
	2825982	36.265	+	P	SLIV_12315
	2831637	-5.875	-	P	SLIV_t12350
	2834806	-146.6	-	S	SLIV_12355
	2835084	-292.065	-	P	SLIV_12355
	2836542	-22.1	-	P	SLIV_12365
	2836817	-29.025	-	P	SLIV_12370
	2838619	940.57	+	P	SLIV_12385
	2844067	-9.34	-	P	SLIV_12405
	2846137	3.91	+	P	SLIV_12420
	2849050	-6.85	-	P	SLIV_12435
	2854359	-6.3	-	P	SLIV_12455
	2862234	-22.03	-	P	SLIV_12470
	2866939	3.74	+	P	SLIV_12485
	2874794	-175.355	-	P	SLIV_12510
	2877887	4.2	+	P	SLIV_12525
	2879082	2343.33	+	P	SLIV_12535
	2880825	-3.15	-	P	SLIV_12545
	2886130	38.91	+	P	SLIV_12565
	2887954	-4.2	-	P	SLIV_12575
	2888821	-6.225	-	P	SLIV_12580
	2890972	6.225	+	P	SLIV_12595
	2893985	14.055	+	P	SLIV_12610
	2896042	119.38	+	P	SLIV_12620
	2898002	-244.075	-	P	SLIV_12625
	2898655	-17.84	-	P	SLIV_12630
	2902776	-189.255	-	P	SLIV_12645
	2903879	-1376.62	-	P	SLIV_12655
	2904094	3.15	+	P	SLIV_12660
	2906618	3.15	+	P	SLIV_12675
	2908598	-41.115	-	P	SLIV_12680
	2909943	-2.18	-	P	SLIV_12685
	2911069	69.005	+	P	SLIV_12695
	2913418	-960.545	-	P	SLIV_12705
	2913437	22.04	+	P	SLIV_12710
	2921526	-3.15	-	P	SLIV_12740
	2923034	3.15	+	P	SLIV_12755
	2923878	6.165	+	P	SLIV_12760
	2924429	-17.12	-	P	SLIV_12765
	2939280	-605.38	-	P	SLIV_12820
	2941734	-3.74	-	P	SLIV_12825
	2952505	-15.09	-	S	SLIV_12865
	2952598	-46.515	-	P	SLIV_12865
	2954042	-203.195	-	P	SLIV_12880
	2955190	-5.25	-	P	SLIV_12885
	2955963	32.66	+	A	SLIV_12890
	2968084	-21.97	-	P	SLIV_12960
	2972184	16.775	+	P	SLIV_12975
	2982424	5.33	+	P	SLIV_13035
	2988114	-6.23	-	P	SLIV_13055
	2993543	-9.115	-	P	SLIV_13065
	2993666	108.485	+	P	SLIV_13070
	2995553	-8.4	-	P	SLIV_13080
	2998119	-62.765	-	P	SLIV_13095
	2998193	7.35	+	P	SLIV_13100
	3007943	-13.64	-	P	SLIV_13145
	3008054	3.15	+	P	SLIV_13150
	3009784	-48.645	-	P	SLIV_13155
	3010706	269.935	+	P	SLIV_13165
	3014177	7.02	+	P	SLIV_13175
	3021383	-11.55	-	P	SLIV_13190
	3021522	7.385	+	P	SLIV_13195
	3027616	-8.985	-	P	SLIV_13220
	3027672	3015.24	+	P	SLIV_13225
	3030786	3.15	+	A	SLIV_13240
	3031437	-275.695	-	P	SLIV_13240
	3039829	-517.84	-	P	SLIV_13275
	3039927	-6.185	-	S	SLIV_13275
	3040738	-10.5	-	S	SLIV_13280
	3040960	-15.28	-	P	SLIV_13280
	3041584	-4.05	-	P	SLIV_13285
	3046818	-48.28	-	P	SLIV_13325
	3054092	-8.845	-	P	SLIV_13365
	3057726	-34.9	-	S	SLIV_13390
	3057776	-202.435	-	P	SLIV_13390
	3058335	3.15	+	P	SLIV_13400
	3058688	-1.87	-	P	SLIV_13395
	3059582	51.41	+	P	SLIV_13405
	3062873	-5.25	-	P	SLIV_13420
	3064998	-270.05	-	P	SLIV_13430
	3067925	-3.15	-	P	SLIV_13445
	3073122	10.25	+	P	SLIV_13475
	3075135	-6.3	-	P	SLIV_13485
	3080054	8.4	+	P	SLIV_13505
	3084323	-8.265	-	P	SLIV_13520
	3084933	-2.49	-	P	SLIV_13525
	3090171	-5.91	-	P	SLIV_13540
	3094860	-268.65	-	P	SLIV_13555
	3094878	35.62	+	P	SLIV_13560
	3095444	71.03	+	P	SLIV_13565
	3099369	-7.35	-	P	SLIV_13580
	3099479	6.3	+	P	SLIV_13585
	3102186	-13.39	-	P	SLIV_13600
	3104057	-99.675	-	P	SLIV_13610
	3104103	-42.34	-	S	SLIV_13610
	3104124	3.445	+	P	SLIV_13615
	3107009	4.98	+	P	SLIV_13635
	3107034	-8.695	-	P	SLIV_13630
	3110978	-42.605	-	P	SLIV_13640
	3113176	-41.185	-	P	SLIV_13650
	3113306	8.4	+	P	SLIV_13655
	3115344	-13.7	-	P	SLIV_13660
	3117245	1.87	+	P	SLIV_13675
	3123404	-650.495	-	P	SLIV_13700
	3123519	-259.855	-	S	SLIV_13700
	3123625	-270.7	-	S	SLIV_13700
	3123940	-132.66	-	P	SLIV_13705
	3126075	-4.2	-	P	SLIV_13715
	3128277	-5.25	-	P	SLIV_13725
	3130347	-5.25	-	P	SLIV_13735
	3131299	-6.3	-	P	SLIV_13740
	3133358	2.8	+	P	SLIV_13760
	3134811	62.375	+	P	SLIV_13770
	3137827	-394.72	-	P	SLIV_13775
	3139445	-171.385	-	P	SLIV_13780
	3143721	-45.22	-	P	SLIV_13800
	3143831	3.74	+	P	SLIV_13805
	3149378	-3.15	-	P	SLIV_13820
	3151710	-142.275	-	P	SLIV_13835
	3151884	7.47	+	I	SLIV_13840
	3154903	15.74	+	P	SLIV_13855
	3157540	-83.755	-	P	SLIV_13870
	3161134	-3.15	-	P	SLIV_13890
	3161289	2.1	+	P	SLIV_13895
	3162615	82.96	+	P	SLIV_13900
	3166078	-4.2	-	P	SLIV_13915
	3173718	-109.26	-	P	SLIV_13950
	3175022	-10.5	-	P	SLIV_13955
	3176423	-4.2	-	P	SLIV_13960
	3181467	-14.32	-	P	SLIV_13980
	3185396	-4.2	-	P	SLIV_14000
	3188537	5.25	+	P	SLIV_14010
	3191305	-8.81	-	P	SLIV_14020
	3194518	-10.5	-	P	SLIV_14030
	3197737	-3.15	-	P	SLIV_14045
	3201474	-4.2	-	P	SLIV_14070
	3204100	6.85	+	P	SLIV_14085
	3207702	63.19	+	P	SLIV_14105
	3208852	37.98	+	P	SLIV_14115
	3211977	22.475	+	P	SLIV_14135
	3212150	-7.35	-	P	SLIV_14130
	3214396	-12.59	-	P	SLIV_14140
	3220496	-45.95	-	P	SLIV_14175
	3222855	-5.25	-	P	SLIV_14185
	3224387	5.29	+	P	SLIV_14195
	3230712	3.285	+	A	SLIV_14225
	3231507	15.01	+	A	SLIV_14225
	3233343	-25.215	-	P	SLIV_14230
	3236451	-20.24	-	P	SLIV_14240
	3238034	-27.205	-	P	SLIV_14250
	3238223	15.905	+	P	SLIV_14255
	3239015	3.6	+	P	SLIV_14260
	3241837	4.05	+	P	SLIV_14270
	3250666	10.5	+	P	SLIV_14305
	3256993	-165.635	-	P	SLIV_14325
	3267502	-292.715	-	P	SLIV_14360
	3268903	-17.825	-	N	-
	3268945	7.16	+	P	SLIV_14370
	3273277	-7.35	-	P	SLIV_14375
	3276282	-32.075	-	P	SLIV_14390
	3276518	71.88	+	P	SLIV_14395
	3276618	-2.2	-	S	SLIV_14390
	3278718	-8.4	-	P	SLIV_14400
	3279784	-4.2	-	P	SLIV_14405
	3283648	-6.3	-	P	SLIV_14425
	3286762	-6.23	-	P	SLIV_14440
	3287480	182.16	+	P	SLIV_14450
	3302792	-40.93	-	P	SLIV_14485
	3304688	-3.15	-	P	SLIV_14490
	3307792	-276.045	-	P	SLIV_14505
	3309441	-200.78	-	P	SLIV_14510
	3311195	-10.145	-	P	SLIV_14520
	3322989	-6.3	-	P	SLIV_14580
	3329664	-6.3	-	P	SLIV_14625
	3332231	-3.15	-	P	SLIV_14635
	3338390	-44.5	-	P	SLIV_14665
	3343432	-549.275	-	P	SLIV_14690
	3348440	-128.165	-	P	SLIV_14715
	3350023	18.37	+	N	-
	3350042	-537.34	-	N	-
	3352026	9.45	+	A	SLIV_14750
	3356091	-265.06	-	P	SLIV_14780
	3363437	-64566.8	-	P	SLIV_14855
	3363478	-748.715	-	S	SLIV_14855
	3368593	-19.19	-	P	SLIV_14865
	3370823	-15.925	-	P	SLIV_14880
	3372333	36076.7	+	P	SLIV_14895
	3372550	-28.34	-	P	SLIV_14890
	3373067	12.84	+	P	SLIV_14900
	3375784	-362.62	-	P	SLIV_14915
	3380523	-262.7	-	P	SLIV_14945
	3401639	-330.33	-	P	SLIV_15040
	3412504	-78.745	-	P	SLIV_15065
	3412767	-61.2	-	S	SLIV_15065
	3414185	-2105.85	-	P	SLIV_15075
	3417600	-313.215	-	P	SLIV_15095
	3419081	-36.73	-	P	SLIV_15105
	3419248	-4.98	-	P	SLIV_t15110
	3419411	80.865	+	P	SLIV_15115
	3420763	44.52	+	P	SLIV_15120
	3423279	-3.15	-	P	SLIV_15125
	3425978	-28.76	-	P	SLIV_15140
	3429071	-7.645	-	P	SLIV_t15175
	3430702	3.74	+	P	SLIV_15185
	3432519	4.98	+	A	SLIV_15190
	3434593	-158.86	-	P	SLIV_15190
	3434851	-19.94	-	P	SLIV_t15195
	3434932	12.76	+	P	SLIV_15200
	3435977	-13.655	-	P	SLIV_15205
	3438524	-18.335	-	P	SLIV_15220
	3439444	-57.915	-	P	SLIV_15225
	3442061	17.12	+	A	SLIV_15235
	3449793	-14.69	-	P	SLIV_15275
	3452882	29.335	+	P	SLIV_15290
	3453913	11.52	+	P	SLIV_15295
	3456245	-7.33	-	A	SLIV_15300
	3467257	-53.53	-	P	SLIV_15350
	3468761	-29.005	-	P	SLIV_15355
	3470899	3.74	+	P	SLIV_15370
	3475956	-11.83	-	P	SLIV_15380
	3476111	17.03	+	P	SLIV_15385
	3479613	3.74	+	A	SLIV_15395
	3484058	-6.595	-	P	SLIV_15415
	3488464	125.59	+	A	SLIV_15430
	3493115	-19.17	-	P	SLIV_15455
	3493795	5.055	+	P	SLIV_15460
	3496811	-13.7	-	P	SLIV_15470
	3496830	6.615	+	P	SLIV_15475
	3498512	-5.25	-	P	SLIV_15485
	3505397	-3.11	-	P	SLIV_15515
	3511639	-240.665	-	P	SLIV_15535
	3512187	-859.82	-	P	SLIV_15540
	3512800	22.97	+	P	SLIV_15550
	3513931	8.46	+	P	SLIV_15560
	3524736	-101.88	-	P	SLIV_15625
	3526222	94.105	+	P	SLIV_15640
	3528968	-6.3	-	P	SLIV_15655
	3529013	143	+	P	SLIV_15660
	3531252	331.66	+	P	SLIV_15670
	3537290	-34.545	-	A	SLIV_15710
	3540139	-1197.07	-	P	SLIV_15730
	3540253	5.64	+	P	SLIV_15735
	3547644	-5.29	-	P	SLIV_15745
	3547776	83.66	+	P	SLIV_15750
	3557153	-58.78	-	P	SLIV_15785
	3557628	-737.465	-	P	SLIV_15790
	3560305	-36.71	-	P	SLIV_15805
	3560817	-19.94	-	P	SLIV_15810
	3563917	-4.98	-	P	SLIV_15825
	3563953	9.3	+	P	SLIV_15830
	3566246	-3.42	-	P	SLIV_15835
	3568057	19.94	+	A	SLIV_15840
	3568583	-4.98	-	P	SLIV_15845
	3573567	-5.29	-	P	SLIV_15870
	3573607	19.27	+	P	SLIV_15875
	3576907	3.15	+	P	SLIV_15895
	3586492	-18.89	-	P	SLIV_15930
	3586540	245.645	+	S	SLIV_15935
	3586644	1104.32	+	P	SLIV_15935
	3588880	-11.55	-	P	SLIV_15950
	3590764	-94.875	-	P	SLIV_15965
	3596834	13.14	+	P	SLIV_16000
	3602093	28.34	+	P	SLIV_16025
	3603377	-4.69	-	A	SLIV_16035
	3611953	-40.155	-	P	SLIV_16085
	3612833	43.115	+	P	SLIV_16090
	3616226	4.36	+	P	SLIV_16110
	3619374	-9.03	-	P	SLIV_16125
	3632830	13.64	+	P	SLIV_16205
	3634086	180.4	+	P	SLIV_16210
	3635920	-61.125	-	P	SLIV_16220
	3636946	-124.665	-	P	SLIV_16225
	3637826	87.11	+	P	SLIV_16235
	3637996	-1167.27	-	P	SLIV_16230
	3640936	17.015	+	P	SLIV_16240
	3647008	-13.7	-	P	SLIV_16255
	3650392	5.6	+	P	SLIV_16280
	3654277	-9.65	-	P	SLIV_16290
	3659512	374.565	+	P	SLIV_16310
	3663001	-14.855	-	P	SLIV_16320
	3669089	-4.28	-	P	SLIV_16355
	3672470	-3.11	-	P	SLIV_16370
	3673475	-5.25	-	P	SLIV_16375
	3673988	-4.05	-	P	SLIV_16380
	3674203	4.2	+	P	SLIV_16385
	3677035	3.42	+	P	SLIV_16400
	3680446	-60.41	-	P	SLIV_16415
	3680988	-33.87	-	P	SLIV_16420
	3686030	31.845	+	P	SLIV_16440
	3686801	30.535	+	P	SLIV_16445
	3690566	-14.04	-	P	SLIV_16455
	3691415	-5.385	-	P	SLIV_16460
	3693355	-8.4	-	P	SLIV_16470
	3693399	3.42	+	P	SLIV_16475
	3696365	-29.075	-	P	SLIV_16485
	3696473	716.43	+	N	-
	3697902	-6.245	-	P	SLIV_16490
	3698089	4.98	+	P	SLIV_16495
	3703868	-5.6	-	P	SLIV_16520
	3713972	12.59	+	P	SLIV_16565
	3715747	-4.2	-	P	SLIV_16575
	3721762	-3.15	-	P	SLIV_16590
	3721865	37.885	+	P	SLIV_16595
	3723622	-114.795	-	P	SLIV_16600
	3724527	-8.005	-	P	SLIV_16605
	3728124	-3.74	-	P	SLIV_16625
	3731554	436.035	+	P	SLIV_16650
	3733522	-467.675	-	P	SLIV_16660
	3734163	-37.15	-	P	SLIV_16665
	3737001	-21.48	-	P	SLIV_16690
	3739559	-482.885	-	P	SLIV_16695
	3743066	-22.06	-	P	SLIV_16715
	3743223	270.295	+	P	SLIV_16720
	3745098	14.69	+	P	SLIV_16730
	3752309	-7.195	-	S	SLIV_16745
	3752485	-14.69	-	P	SLIV_16745
	3753975	5.62	+	P	SLIV_16755
	3756601	-16.5	-	P	SLIV_16770
	3759300	-44.415	-	P	SLIV_16785
	3759397	2.1	+	P	SLIV_16790
	3762612	3.42	+	P	SLIV_16805
	3773824	2.18	+	P	SLIV_16865
	3775846	78.87	+	P	SLIV_16880
	3776925	6.475	+	P	SLIV_16890
	3783104	-7735.51	-	P	SLIV_16915
	3785693	-30.99	-	P	SLIV_16930
	3785711	4.05	+	P	SLIV_16935
	3787601	9.155	+	P	SLIV_16945
	3792433	-189.23	-	P	SLIV_16965
	3798585	-25.835	-	P	SLIV_16990
	3798823	-19.94	-	S	SLIV_16990
	3800474	87.065	+	S	SLIV_17010
	3800556	2398.57	+	P	SLIV_17010
	3819308	-7.47	-	A	SLIV_17085
	3819452	7.37	+	P	SLIV_17090
	3823758	-159.995	-	P	SLIV_17100
	3825299	-93.11	-	P	SLIV_17105
	3829253	-13.82	-	P	SLIV_17115
	3829425	51.93	+	P	SLIV_17120
	3836381	18.89	+	P	SLIV_17145
	3846014	22.615	+	P	SLIV_17190
	3847446	100.555	+	P	SLIV_17195
	3850487	-35.405	-	P	SLIV_17205
	3854862	5.62	+	N	-
	3855631	-16441.3	-	P	SLIV_17230
	3856242	3.11	+	P	SLIV_17235
	3859161	-11.45	-	P	SLIV_17245
	3859307	1084.46	+	P	SLIV_17250
	3860863	3.15	+	P	SLIV_17265
	3864055	-33.83	-	P	SLIV_17280
	3864121	14.16	+	P	SLIV_17285
	3864574	11.955	+	P	SLIV_17290
	3866423	-393.495	-	P	SLIV_17300
	3868620	-376.245	-	P	SLIV_17315
	3868722	-39.985	-	S	SLIV_17315
	3868743	8060.97	+	P	SLIV_17320
	3870232	-3.11	-	P	SLIV_17330
	3872239	-7.955	-	P	SLIV_17340
	3873639	-5.91	-	P	SLIV_17350
	3877689	18.89	+	P	SLIV_17375
	3879667	-17.565	-	P	SLIV_17380
	3880832	-25.19	-	P	SLIV_17390
	3881678	24.14	+	P	SLIV_17400
	3889560	-16.16	-	P	SLIV_17430
	3890896	738.215	+	P	SLIV_17445
	3896555	-184.765	-	P	SLIV_17475
	3897675	-45.285	-	P	SLIV_17490
	3898539	30.825	+	P	SLIV_17500
	3898553	-4.2	-	P	SLIV_17495
	3904869	-32.54	-	P	SLIV_17545
	3906357	-3.74	-	P	SLIV_17555
	3909046	-3.15	-	P	SLIV_17570
	3909928	15.25	+	P	SLIV_17580
	3915853	-44.83	-	P	SLIV_17605
	3915880	31.835	+	P	SLIV_17610
	3918338	-4.36	-	P	SLIV_17615
	3924897	3.11	+	P	SLIV_17655
	3929302	6.23	+	P	SLIV_17670
	3933813	-74.945	-	I	SLIV_17690
	3935047	25.57	+	P	SLIV_17700
	3935439	-5.29	-	P	SLIV_17695
	3936091	-9.775	-	P	SLIV_17705
	3940096	-88.73	-	P	SLIV_17720
	3940208	-26.24	-	S	SLIV_17720
	3941229	-142.58	-	P	SLIV_17725
	3941409	-16.79	-	S	SLIV_17725
	3957815	-11.21	-	P	SLIV_17790
	3957878	8.72	+	P	SLIV_17795
	3962757	38.015	+	P	SLIV_17810
	3971532	-15.74	-	P	SLIV_17825
	3972049	-4.2	-	N	-
	3972142	14.53	+	P	SLIV_17830
	3973679	20.865	+	P	SLIV_17835
	3975514	-67.265	-	P	SLIV_17840
	3978476	3.11	+	A	SLIV_17855
	3980134	-295.83	-	P	SLIV_17860
	3984374	7.35	+	P	SLIV_17885
	3993154	-2.18	-	P	SLIV_17925
	3994319	-254.845	-	P	SLIV_17935
	4001907	-89.475	-	P	SLIV_17970
	4002091	5.25	+	N	-
	4002113	-5.99	-	S	SLIV_17970
	4003169	-14.69	-	P	SLIV_17975
	4003336	29.12	+	P	SLIV_17980
	4007820	-20.32	-	P	SLIV_17995
	4012345	78.26	+	P	SLIV_18025
	4016243	-54.585	-	P	SLIV_18040
	4022181	-28.33	-	P	SLIV_18080
	4023863	-18.41	-	P	SLIV_18085
	4026082	-116.995	-	P	SLIV_18090
	4031375	-6.265	-	P	SLIV_18115
	4032696	31.13	+	P	SLIV_18130
	4037088	-3.81	-	N	-
	4042226	10.03	+	P	SLIV_18170
	4044852	32.35	+	P	SLIV_18190
	4050303	10.58	+	P	SLIV_18240
	4057460	-9.45	-	P	SLIV_18270
	4057580	19.94	+	P	SLIV_18275
	4060907	-9.34	-	P	SLIV_18290
	4073064	-185.445	-	P	SLIV_18345
	4074098	-28.2	-	P	SLIV_18355
	4074641	-7.12	-	P	SLIV_t18365
	4075314	96.345	+	P	SLIV_18375
	4085230	-70.97	-	P	SLIV_18400
	4088240	-9.74	-	P	SLIV_t18420
	4088939	15.7	+	P	SLIV_18430
	4091667	-53.34	-	P	SLIV_18435
	4093979	76.43	+	P	SLIV_18450
	4097027	-2517.97	-	P	SLIV_18460
	4098805	116.715	+	P	SLIV_18470
	4100873	-8.4	-	P	SLIV_18475
	4107610	17.69	+	P	SLIV_18510
	4109052	6.3	+	P	SLIV_18515
	4114893	-27.27	-	P	SLIV_18540
	4118934	10.37	+	P	SLIV_18565
	4130044	-2155.95	-	P	SLIV_18595
	4131334	-80.855	-	P	SLIV_18600
	4131715	4.86	+	P	SLIV_18605
	4133167	26.035	+	P	SLIV_18610
	4134431	101.07	+	P	SLIV_18615
	4137546	-15.74	-	I	SLIV_18625
	4138938	-36.73	-	P	SLIV_18625
	4142440	-233.465	-	P	SLIV_18645
	4142895	-118.78	-	P	SLIV_18650
	4142911	136.305	+	P	SLIV_18655
	4145142	-3.42	-	N	-
	4145161	5.6	+	P	SLIV_18670
	4146182	33.34	+	P	SLIV_18675
	4149568	-10.5	-	P	SLIV_18690
	4149639	4.59	+	P	SLIV_18695
	4150175	259.92	+	P	SLIV_18700
	4157434	-354.515	-	P	SLIV_18735
	4157501	9.45	+	P	SLIV_18740
	4157937	94.405	+	P	SLIV_18745
	4164769	-80.695	-	P	SLIV_18760
	4164916	52.075	+	P	SLIV_18765
	4168178	25.64	+	P	SLIV_18780
	4170296	-6.3	-	P	SLIV_18785
	4178891	824.465	+	P	SLIV_18815
	4181202	-14.135	-	P	SLIV_18825
	4183505	-332.45	-	P	SLIV_18835
	4187563	-1562.56	-	N	-
	4190031	3.42	+	N	-
	4191952	74.965	+	P	SLIV_18875
	4194928	94.665	+	P	SLIV_18890
	4201509	-7.47	-	P	SLIV_18910
	4202064	144.225	+	P	SLIV_18915
	4212547	312.895	+	P	SLIV_18960
	4216626	-78.445	-	P	SLIV_18970
	4217129	125.14	+	P	SLIV_18980
	4218834	-79.975	-	P	SLIV_18985
	4218855	-32.1	-	S	SLIV_18985
	4219012	-13.92	-	S	SLIV_18985
	4219103	121.35	+	P	SLIV_18990
	4221287	-188.045	-	P	SLIV_19000
	4221307	3.42	+	P	SLIV_19005
	4222153	225.905	+	P	SLIV_19010
	4226986	-107.8	-	P	SLIV_19030
	4233407	-229.39	-	P	SLIV_19055
	4236759	26.15	+	P	SLIV_19075
	4243046	-82.515	-	P	SLIV_19100
	4245947	1.87	+	P	SLIV_19120
	4255395	12.56	+	P	SLIV_19160
	4257381	742.525	+	P	SLIV_19170
	4259779	-27.48	-	P	SLIV_19175
	4259908	-9.805	-	S	SLIV_19175
	4263015	639.175	+	P	SLIV_19195
	4268010	-284.63	-	P	SLIV_19210
	4270735	-12.59	-	P	SLIV_19225
	4273736	-9.34	-	P	SLIV_19240
	4273761	54.825	+	P	SLIV_19245
	4274421	-20.24	-	A	SLIV_19245
	4275671	-21.35	-	P	SLIV_19255
	4281272	41.225	+	N	-
	4281470	60.835	+	N	-
	4281865	-8.4	-	P	SLIV_19280
	4282371	-15.965	-	P	SLIV_19285
	4284090	-5.115	-	P	SLIV_19295
	4286080	-190.34	-	P	SLIV_19300
	4291144	4.98	+	P	SLIV_19325
	4294452	-155.45	-	P	SLIV_19335
	4296140	-61.85	-	P	SLIV_19340
	4297908	220.61	+	P	SLIV_19350
	4305780	4.025	+	P	SLIV_19390
	4310218	-4.36	-	P	SLIV_19400
	4322642	6.3	+	P	SLIV_19460
	4324345	-35.815	-	P	SLIV_19470
	4325368	-3.15	-	P	SLIV_19475
	4328079	461.37	+	P	SLIV_19490
	4330655	70.53	+	P	SLIV_19500
	4346704	463.64	+	P	SLIV_19565
	4360677	-175.35	-	P	SLIV_19650
	4361644	20.995	+	S	SLIV_19660
	4362071	51.43	+	P	SLIV_19660
	4364482	-18.61	-	P	SLIV_19670
	4369311	5.425	+	P	SLIV_19700
	4374199	-21.7	-	A	SLIV_19720
	4387178	3.11	+	P	SLIV_19795
	4393362	-6.01	-	P	SLIV_19835
	4405699	154.03	+	P	SLIV_19910
	4405991	16.01	+	S	SLIV_19910
	4414941	109.655	+	P	SLIV_19945
	4416194	-5.855	-	A	SLIV_19945
	4419350	38.51	+	P	SLIV_19965
	4423705	-14.63	-	P	SLIV_19980
	4423766	126.98	+	P	SLIV_19985
	4424589	287.32	+	P	SLIV_19990
	4427366	3550.45	+	P	SLIV_19995
	4429289	45.19	+	P	SLIV_20005
	4429975	3.42	+	P	SLIV_20010
	4430117	-29.59	-	A	SLIV_20010
	4437054	81.87	+	P	SLIV_20045
	4446117	3.15	+	P	SLIV_20085
	4452374	-13.64	-	P	SLIV_20115
	4456638	-12.15	-	P	SLIV_20140
	4457631	504.335	+	P	SLIV_20150
	4461013	33.475	+	P	SLIV_20170
	4464303	-16.275	-	P	SLIV_20185
	4464498	7.35	+	P	SLIV_20190
	4467801	-4.67	-	P	SLIV_20195
	4467952	98.815	+	P	SLIV_20200
	4470144	577.04	+	S	SLIV_20220
	4470217	1292.49	+	P	SLIV_20220
	4476111	453.1	+	P	SLIV_20245
	4480256	583.495	+	P	SLIV_20255
	4486329	2.49	+	N	-
	4502109	5.37	+	N	-
	4503943	-61.01	-	P	SLIV_20380
	4504064	45.27	+	P	SLIV_20385
	4506926	-21.96	-	P	SLIV_20390
	4506988	80.05	+	P	SLIV_20395
	4507322	55.355	+	S	SLIV_20395
	4510172	-14.96	-	P	SLIV_20405
	4510325	92.63	+	P	SLIV_20410
	4514942	-124.07	-	P	SLIV_20435
	4515051	1832.05	+	P	SLIV_20440
	4518600	-24.59	-	N	-
	4526704	-3.11	-	P	SLIV_20475
	4529249	-4.36	-	P	SLIV_20485
	4531503	3.15	+	N	-
	4531889	4.085	+	P	SLIV_20500
	4540306	184.1	+	S	SLIV_20540
	4540463	999.74	+	S	SLIV_20540
	4540505	2001.84	+	P	SLIV_20540
	4544401	855.39	+	P	SLIV_20555
	4547176	469.075	+	P	SLIV_20570
	4568169	275.045	+	P	SLIV_20665
	4575710	7.35	+	P	SLIV_20700
	4576317	7.585	+	P	SLIV_20705
	4577509	-18.9	-	P	SLIV_20710
	4581198	-2.18	-	P	SLIV_20725
	4585262	76.25	+	I	SLIV_20745
	4585764	82.865	+	P	SLIV_20750
	4590264	-319.255	-	P	SLIV_20770
	4591869	-10.5	-	P	SLIV_20780
	4594240	-4.2	-	P	SLIV_20785
	4599208	45.45	+	P	SLIV_20810
	4614127	12.7	+	P	SLIV_20880
	4615545	65.765	+	P	SLIV_20895
	4616717	1129.08	+	P	SLIV_20905
	4622772	-106.675	-	P	SLIV_20910
	4628765	-7.975	-	P	SLIV_20925
	4630489	-38.285	-	P	SLIV_20935
	4630565	53.76	+	P	SLIV_20940
	4632760	39.005	+	P	SLIV_20950
	4633564	11.83	+	P	SLIV_20955
	4635415	-31.005	-	P	SLIV_20970
	4636021	17.84	+	P	SLIV_20980
	4640581	-11.52	-	P	SLIV_21000
	4641917	11.82	+	P	SLIV_21010
	4645985	4.125	+	P	SLIV_21025
	4648663	-28.735	-	P	SLIV_21030
	4651473	4.745	+	P	SLIV_21050
	4655580	-22.77	-	P	SLIV_21055
	4655678	7.85	+	P	SLIV_21060
	4661314	14.69	+	P	SLIV_21095
	4665006	-12.72	-	P	SLIV_21110
	4665084	14.29	+	N	-
	4670880	18.025	+	P	SLIV_21130
	4675872	2027.45	+	P	SLIV_21155
	4680111	-184.125	-	P	SLIV_21175
	4681113	-559.59	-	P	SLIV_21180
	4682473	13.07	+	P	SLIV_21190
	4682797	86.59	+	P	SLIV_21195
	4686802	-25.36	-	A	SLIV_21210
	4688457	3.445	+	P	SLIV_21215
	4692670	-14.29	-	P	SLIV_21235
	4693194	43.04	+	P	SLIV_21240
	4702156	29.57	+	P	SLIV_21275
	4706506	-80.4	-	P	SLIV_21285
	4712054	9.45	+	P	SLIV_21320
	4713940	8.435	+	P	SLIV_21330
	4729644	8.4	+	P	SLIV_21375
	4736684	4.92	+	P	SLIV_21410
	4737997	-126.94	-	P	SLIV_21420
	4738238	8.035	+	P	SLIV_21425
	4739033	-11.205	-	P	SLIV_21435
	4739577	162.94	+	P	SLIV_21445
	4798583	-3.15	-	P	SLIV_21540
	4812970	-19.155	-	P	SLIV_21605
	4815952	41.205	+	P	SLIV_21615
	4825828	12.925	+	P	SLIV_21655
	4830134	6.54	+	P	SLIV_21680
	4840351	-5.37	-	P	SLIV_21715
	4845087	-170.73	-	P	SLIV_21740
	4846741	-8.015	-	P	SLIV_21750
	4847242	-195.795	-	P	SLIV_21755
	4850441	-54.12	-	P	SLIV_21765
	4850568	87.66	+	P	SLIV_21770
	4854238	38.15	+	P	SLIV_21780
	4862378	-7.35	-	P	SLIV_21820
	4871447	54.09	+	P	SLIV_21860
	4880495	14.465	+	P	SLIV_21905
	4884414	-18.735	-	P	SLIV_21915
	4885113	-96.45	-	P	SLIV_21920
	4890892	4.22	+	P	SLIV_21950
	4905848	31.49	+	P	SLIV_22010
	4907254	-12.99	-	I	SLIV_22015
	4916722	-557.84	-	P	SLIV_22060
	4919396	-12.14	-	P	SLIV_22070
	4920425	132.405	+	P	SLIV_22090
	4922899	-6.165	-	P	SLIV_22100
	4923095	54.58	+	P	SLIV_22105
	4937517	-44.64	-	P	SLIV_22145
	4947725	23.5	+	P	SLIV_22195
	4950073	263.08	+	P	SLIV_22205
	4954049	1148.64	+	P	SLIV_22225
	4962615	-77.415	-	P	SLIV_22260
	4964697	907.655	+	S	SLIV_22280
	4964723	115.265	+	S	SLIV_22280
	4964766	2456.12	+	P	SLIV_22280
	4970198	43.63	+	P	SLIV_22310
	4978919	-13.92	-	A	SLIV_22345
	4979963	22.13	+	P	SLIV_22350
	4981314	115.24	+	S	SLIV_22360
	4981399	-35.18	-	P	SLIV_22355
	4981518	190.15	+	P	SLIV_22360
	4985099	-3.15	-	P	SLIV_22375
	4985330	38.535	+	P	SLIV_22380
	4988079	7.875	+	P	SLIV_22395
	4993107	-5.29	-	P	SLIV_22420
	4993831	11.55	+	P	SLIV_22430
	4997707	21.855	+	P	SLIV_22440
	4999011	14.65	+	P	SLIV_22445
	5000702	-20.94	-	P	SLIV_22450
	5011263	-8.9	-	P	SLIV_22480
	5013664	-56.17	-	P	SLIV_22490
	5019758	-17.43	-	P	SLIV_22515
	5020777	11.36	+	S	SLIV_22525
	5020942	343.275	+	P	SLIV_22525
	5027280	-4.2	-	P	SLIV_22540
	5027617	12.5	+	P	SLIV_22545
	5029821	29.39	+	P	SLIV_22555
	5031426	3.715	+	P	SLIV_22560
	5035237	710.44	+	P	SLIV_22580
	5038637	3.15	+	P	SLIV_22595
	5039753	137.74	+	N	-
	5051948	84.52	+	I	SLIV_22640
	5052460	3320.16	+	P	SLIV_22645
	5058052	146.165	+	S	SLIV_22665
	5058198	460.645	+	S	SLIV_22665
	5058249	248.115	+	S	SLIV_22665
	5058278	1096.3	+	P	SLIV_22665
	5062035	-7.78	-	P	SLIV_22680
	5062164	18.05	+	S	SLIV_22685
	5062257	34.355	+	P	SLIV_22685
	5068117	3.15	+	P	SLIV_22705
	5079662	-3.15	-	P	SLIV_22725
	5080940	-17.09	-	P	SLIV_22735
	5081056	13.145	+	P	SLIV_22740
	5084335	-33.535	-	P	SLIV_22760
	5100537	63.235	+	P	SLIV_22820
	5105381	-68.36	-	P	SLIV_22825
	5107382	25.3	+	P	SLIV_22835
	5108736	1735.16	+	P	SLIV_22840
	5110045	117.3	+	P	SLIV_22845
	5111421	-107.31	-	S	SLIV_22850
	5111457	-143.055	-	P	SLIV_22850
	5111580	19.61	+	P	SLIV_22855
	5114559	462.17	+	P	SLIV_22870
	5115103	213.37	+	N	-
	5118051	218.31	+	P	SLIV_22885
	5129098	19.52	+	P	SLIV_22925
	5133298	14.69	+	P	SLIV_22940
	5134950	35.18	+	S	SLIV_22945
	5135049	280.48	+	P	SLIV_22945
	5137033	-14.83	-	P	SLIV_22950
	5137835	181.545	+	P	SLIV_22960
	5143267	25.26	+	P	SLIV_22985
	5150732	-22.12	-	P	SLIV_23005
	5152717	14.69	+	P	SLIV_23015
	5161729	39.53	+	P	SLIV_23060
	5164452	3.15	+	P	SLIV_23070
	5166387	-827.765	-	P	SLIV_23075
	5166561	6.36	+	P	SLIV_23080
	5169711	28.43	+	P	SLIV_23095
	5174770	-10.58	-	P	SLIV_23110
	5174889	571.8	+	P	SLIV_23115
	5178308	22.245	+	P	SLIV_23135
	5182297	-2.8	-	P	SLIV_23150
	5183814	93.08	+	P	SLIV_23160
	5184247	8.965	+	P	SLIV_23165
	5186808	-523.895	-	P	SLIV_23185
	5186871	390.2	+	P	SLIV_23190
	5187259	134.995	+	P	SLIV_23195
	5190618	-5.25	-	P	SLIV_23205
	5193525	19.635	+	P	SLIV_23225
	5198958	7.14	+	P	SLIV_23245
	5199724	-18.975	-	P	SLIV_23250
	5207233	-43.82	-	P	SLIV_23290
	5211969	-16.79	-	P	SLIV_23310
	5215220	74.095	+	P	SLIV_23335
	5218821	18.045	+	P	SLIV_23355
	5231360	15.88	+	P	SLIV_23440
	5234495	-5.29	-	P	SLIV_23455
	5234559	73.24	+	P	SLIV_23460
	5240440	-12.47	-	P	SLIV_23475
	5244798	-11.335	-	P	SLIV_23505
	5248103	13.345	+	P	SLIV_23530
	5251829	-38.62	-	P	SLIV_23545
	5258215	13.065	+	P	SLIV_23585
	5262085	-4.2	-	P	SLIV_23595
	5263807	-14.095	-	P	SLIV_23605
	5265094	16.135	+	S	SLIV_23615
	5265132	90.485	+	P	SLIV_23615
	5271113	-23.355	-	P	SLIV_23635
	5273625	-1.56	-	P	SLIV_23645
	5273771	8.4	+	P	SLIV_23650
	5275854	14.01	+	P	SLIV_23665
	5284702	8.4	+	P	SLIV_23700
	5284891	3.15	+	S	SLIV_23700
	5287204	-39.28	-	P	SLIV_23710
	5288759	-151.19	-	P	SLIV_23715
	5288837	-22.805	-	S	SLIV_23715
	5289499	4.825	+	P	SLIV_23725
	5292331	-36.42	-	P	SLIV_23735
	5293316	-115.805	-	P	SLIV_23740
	5308338	-4.2	-	P	SLIV_23795
	5313091	19.755	+	P	SLIV_23825
	5319869	-41.905	-	P	SLIV_23850
	5325330	321.555	+	P	SLIV_23870
	5334466	-8.265	-	P	SLIV_23905
	5334493	6.3	+	P	SLIV_23910
	5345023	2.975	+	P	SLIV_23960
	5346635	-110.285	-	P	SLIV_23965
	5347608	-8.73	-	N	-
	5350127	7647.52	+	P	SLIV_23990
	5352007	-1220.78	-	N	-
	5352630	-7.8	-	P	SLIV_23995
	5353699	-2.8	-	P	SLIV_24000
	5353760	3.42	+	P	SLIV_24005
	5362086	-5.25	-	P	SLIV_24045
	5372199	-3.285	-	P	SLIV_24075
	5372234	46.835	+	P	SLIV_24080
	5391225	-3.15	-	P	SLIV_24175
	5403391	4.2	+	P	SLIV_24240
	5404705	-7.35	-	P	SLIV_t24245
	5414793	-9.65	-	P	SLIV_24270
	5416140	-13.375	-	P	SLIV_24285
	5416341	1868.46	+	P	SLIV_24290
	5427098	-16.81	-	P	SLIV_24320
	5427194	3.97	+	P	SLIV_24325
	5439687	-20.99	-	P	SLIV_24360
	5448107	6.3	+	P	SLIV_24400
	5450695	-21.175	-	P	SLIV_24415
	5450769	6.3	+	P	SLIV_24420
	5451745	21.17	+	P	SLIV_24425
	5454385	15.77	+	P	SLIV_24435
	5461011	-14.31	-	P	SLIV_24460
	5462773	-10.245	-	P	SLIV_24470
	5463976	-85.2	-	S	SLIV_24475
	5464055	-94.21	-	P	SLIV_24475
	5473235	126.345	+	P	SLIV_24505
	5474702	-411.555	-	P	SLIV_24510
	5478938	-9.03	-	P	SLIV_24525
	5479089	307.4	+	P	SLIV_24530
	5481821	-53.245	-	P	SLIV_24540
	5485464	15.26	+	P	SLIV_24560
	5485999	-11.315	-	P	SLIV_t24565
	5486165	331.945	+	P	SLIV_24575
	5487935	2279.59	+	P	SLIV_24580
	5489024	-6.69	-	A	SLIV_24585
	5489517	604.905	+	P	SLIV_24590
	5492010	-43.345	-	P	SLIV_24595
	5492117	437.25	+	P	SLIV_24600
	5510166	-293.245	-	P	SLIV_24660
	5510970	16.6	+	P	SLIV_24665
	5520656	3092.75	+	P	SLIV_24690
	5523079	68.33	+	P	SLIV_24705
	5524907	-15.61	-	A	SLIV_24705
	5540209	10.5	+	P	SLIV_24740
	5546582	21.48	+	P	SLIV_24770
	5546750	-199.83	-	P	SLIV_24765
	5549668	17.78	+	P	SLIV_24790
	5551156	550.825	+	P	SLIV_24805
	5555105	237.175	+	P	SLIV_24830
	5564189	16.115	+	P	SLIV_24855
	5565451	76.095	+	P	SLIV_24865
	5567097	-3.42	-	P	SLIV_24870
	5567172	2.49	+	P	SLIV_24875
	5577561	80.185	+	P	SLIV_24910
	5586365	154.265	+	P	SLIV_24945
	5597110	-58.675	-	P	SLIV_24990
	5603349	-76.265	-	P	SLIV_25025
	5606152	-6.595	-	P	SLIV_25040
	5606352	4.05	+	P	SLIV_25045
	5609755	4.67	+	P	SLIV_25060
	5624290	-43.8	-	P	SLIV_25120
	5624327	283.795	+	P	SLIV_25125
	5626960	-82.605	-	P	SLIV_25145
	5629835	210.79	+	P	SLIV_25165
	5646093	7.16	+	P	SLIV_25215
	5661717	5.64	+	P	SLIV_25280
	5672983	8.4	+	P	SLIV_25335
	5685955	-8.575	-	P	SLIV_25375
	5686374	-148.8	-	P	SLIV_25380
	5686412	17.84	+	P	SLIV_t25385
	5687088	12.235	+	P	SLIV_25400
	5704352	-23.935	-	P	SLIV_25465
	5708293	-114.94	-	N	-
	5714235	26.475	+	P	SLIV_25500
	5720423	-28.425	-	P	SLIV_25525
	5730859	-8.4	-	P	SLIV_25560
	5763635	-9.45	-	P	SLIV_25710
	5763751	5.29	+	P	SLIV_25715
	5765436	16.47	+	P	SLIV_25725
	5775710	20.97	+	P	SLIV_25775
	5782902	4.9	+	P	SLIV_25820
	5788036	-5.425	-	P	SLIV_25830
	5788090	30.44	+	P	SLIV_25835
	5794029	-2.49	-	P	SLIV_25865
	5794203	2.1	+	P	SLIV_25870
	5804836	14.6	+	P	SLIV_25920
	5808940	-3.11	-	P	SLIV_25940
	5809693	-19.94	-	P	SLIV_25945
	5810827	5.25	+	P	SLIV_25955
	5812924	-6.38	-	P	SLIV_25960
	5815769	8.4	+	P	SLIV_25975
	5817476	-119.62	-	P	SLIV_25985
	5820828	5.29	+	P	SLIV_26010
	5828651	-3.15	-	P	SLIV_26040
	5840613	69.62	+	I	SLIV_26075
	5841403	242.025	+	P	SLIV_26080
	5843875	12.81	+	A	SLIV_26100
	5850207	-5.91	-	P	SLIV_26125
	5850226	5.25	+	P	SLIV_26130
	5854974	-83.68	-	P	SLIV_26150
	5858448	-59.17	-	P	SLIV_26165
	5866305	8.245	+	P	SLIV_26200
	5867612	-2911.28	-	P	SLIV_26205
	5869143	7.35	+	P	SLIV_26215
	5873995	-3.15	-	P	SLIV_26235
	5875367	-37.995	-	P	SLIV_26245
	5877224	3108.88	+	I	SLIV_26255
	5880477	-30.845	-	P	SLIV_26270
	5882690	7.54	+	P	SLIV_26290
	5885492	-24.28	-	P	SLIV_26295
	5892812	-61.95	-	P	SLIV_26330
	5903339	17.225	+	P	SLIV_26380
	5905708	59.345	+	P	SLIV_26395
	5916175	-9.96	-	P	SLIV_26435
	5917288	-5.855	-	P	SLIV_26440
	5922686	-53.63	-	P	SLIV_26470
	5926068	203.75	+	P	SLIV_26490
	5931893	-53.785	-	P	SLIV_26515
	5932004	8.83	+	P	SLIV_26520
	5941661	-3.15	-	P	SLIV_26560
	5941832	39.63	+	P	SLIV_26565
	5959482	-37.365	-	P	SLIV_26625
	5967895	-3.97	-	P	SLIV_26665
	5968539	-17.48	-	P	SLIV_26670
	5970670	-45.6	-	P	SLIV_26685
	5970784	13.19	+	P	SLIV_26690
	5974439	-71.795	-	P	SLIV_26710
	5974504	11.55	+	P	SLIV_26715
	5975720	-45.315	-	P	SLIV_26720
	5977322	-84.69	-	P	SLIV_26725
	5978751	-160.885	-	P	SLIV_26735
	5981217	-14.69	-	P	SLIV_26750
	5981357	6.3	+	P	SLIV_26755
	5985691	-6.85	-	P	SLIV_26765
	5985764	5.29	+	P	SLIV_26770
	5994445	-29.385	-	P	SLIV_26800
	5997938	-483.6	-	P	SLIV_26810
	5999819	-7.605	-	P	SLIV_26815
	6009048	-31.885	-	I	SLIV_26865
	6009131	163.525	+	P	SLIV_26870
	6017180	-967.155	-	P	SLIV_26895
	6017370	222.08	+	P	SLIV_26900
	6017436	130.665	+	S	SLIV_26900
	6019905	56.66	+	P	SLIV_26915
	6022420	-38.405	-	P	SLIV_26920
	6022647	42.8	+	P	SLIV_26925
	6027792	-9.085	-	P	SLIV_26945
	6027963	153.74	+	P	SLIV_26950
	6033446	30.96	+	P	SLIV_26975
	6040741	-120.955	-	P	SLIV_27005
	6041572	158.985	+	P	SLIV_27015
	6043464	17.215	+	P	SLIV_27025
	6048433	-5.29	-	P	SLIV_27040
	6051806	-10.5	-	P	SLIV_27050
	6052785	10.735	+	P	SLIV_27060
	6054701	7.06	+	P	SLIV_27070
	6055363	77.225	+	P	SLIV_27075
	6058803	26.425	+	P	SLIV_27095
	6068817	-4.67	-	P	SLIV_27125
	6071236	-37.1	-	P	SLIV_27140
	6071393	5.935	+	P	SLIV_27145
	6077632	-3.775	-	P	SLIV_27170
	6079103	121.11	+	P	SLIV_27180
	6085067	-24.91	-	P	SLIV_27205
	6086917	94.32	+	P	SLIV_27220
	6092613	-429.675	-	P	SLIV_27235
	6093285	-6.145	-	P	SLIV_27240
	6093496	8.4	+	P	SLIV_27245
	6100012	64.295	+	I	SLIV_27265
	6104170	31.995	+	P	SLIV_27285
	6110111	268.805	+	P	SLIV_27315
	6115407	-336.04	-	P	SLIV_27325
	6115552	347.975	+	P	SLIV_27330
	6115638	192.685	+	S	SLIV_27330
	6127128	4.36	+	P	SLIV_27385
	6131142	18.645	+	P	SLIV_27395
	6139677	-3.655	-	P	SLIV_27430
	6150999	114.045	+	P	SLIV_27505
	6151924	24.985	+	P	SLIV_27515
	6164779	30.33	+	P	SLIV_27575
	6176547	-8.4	-	P	SLIV_27610
	6176641	8.4	+	P	SLIV_27615
	6184592	302.115	+	P	SLIV_27640
	6186550	449.605	+	P	SLIV_27650
	6193154	-45.13	-	P	SLIV_27675
	6197972	24.52	+	P	SLIV_27700
	6201459	22.04	+	P	SLIV_27710
	6207275	-19.94	-	P	SLIV_27720
	6207338	17.74	+	P	SLIV_27725
	6209171	53.89	+	P	SLIV_27730
	6211626	702.415	+	P	SLIV_27750
	6214389	9.63	+	P	SLIV_27770
	6221770	13.28	+	P	SLIV_27805
	6223233	7.35	+	P	SLIV_27820
	6233815	-108.405	-	P	SLIV_27875
	6233983	4.025	+	P	SLIV_27880
	6237227	73.83	+	P	SLIV_27890
	6240073	25.015	+	P	SLIV_27900
	6243913	-24.35	-	P	SLIV_27915
	6244660	-212.985	-	P	SLIV_27920
	6244792	4.36	+	P	SLIV_27925
	6250373	-13.64	-	P	SLIV_27940
	6252310	53.86	+	P	SLIV_27955
	6260841	30.815	+	S	SLIV_27980
	6260973	604.625	+	P	SLIV_27980
	6275612	-4.98	-	P	SLIV_28040
	6275799	416.1	+	P	SLIV_28045
	6282034	-8.09	-	P	SLIV_28075
	6283071	38.68	+	P	SLIV_28085
	6290690	6.73	+	P	SLIV_28135
	6294151	2.8	+	P	SLIV_28160
	6297833	-28.35	-	P	SLIV_28175
	6297948	4.05	+	P	SLIV_28180
	6305274	-32.43	-	P	SLIV_28200
	6314276	22.04	+	P	SLIV_28250
	6330789	4.2	+	P	SLIV_28325
	6335279	-13.395	-	P	SLIV_28350
	6336106	12.035	+	P	SLIV_28360
	6336126	-7.35	-	P	SLIV_28355
	6339362	5.115	+	P	SLIV_28375
	6343838	-43.58	-	P	SLIV_28395
	6347240	5.485	+	P	SLIV_28415
	6366906	-6.825	-	P	SLIV_28480
	6373081	-9.465	-	P	SLIV_28510
	6375068	73.47	+	P	SLIV_28520
	6377144	118.95	+	P	SLIV_28535
	6380334	-51.54	-	P	SLIV_28560
	6387987	-2.49	-	P	SLIV_28595
	6390299	18.645	+	P	SLIV_28610
	6392281	-58.77	-	P	SLIV_28620
	6397300	207.085	+	P	SLIV_28645
	6399671	-3.15	-	P	SLIV_28655
	6399705	14.63	+	P	SLIV_28660
	6401172	11.04	+	N	-
	6401771	10.03	+	P	SLIV_28675
	6403596	-3.15	-	P	SLIV_28680
	6405764	-3.74	-	P	SLIV_28685
	6405889	33.95	+	P	SLIV_28690
	6409429	3.655	+	A	SLIV_28695
	6413716	289.45	+	P	SLIV_28720
	6415000	8.58	+	P	SLIV_28730
	6415941	42.05	+	P	SLIV_28735
	6418884	-129.99	-	P	SLIV_28750
	6419322	-17.905	-	S	SLIV_28750
	6419721	-1170.62	-	P	SLIV_28755
	6419759	-412.11	-	S	SLIV_28755
	6419801	-20.47	-	S	SLIV_28755
	6419843	-352.485	-	S	SLIV_28755
	6429369	50.74	+	P	SLIV_28795
	6429599	13.025	+	S	SLIV_28795
	6434216	-20.98	-	P	SLIV_28815
	6435012	173.02	+	P	SLIV_28830
	6436483	35.355	+	P	SLIV_28835
	6444063	-16.81	-	P	SLIV_28855
	6444236	29.035	+	P	SLIV_28860
	6450468	232.705	+	P	SLIV_28880
	6454107	148.98	+	P	SLIV_28900
	6459184	32.06	+	P	SLIV_28930
	6466733	15.285	+	P	SLIV_28975
	6468083	-219.65	-	P	SLIV_28980
	6473462	-211.44	-	P	SLIV_29000
	6473522	-8.4	-	S	SLIV_29000
	6473625	11.915	+	S	SLIV_29005
	6473683	14.16	+	P	SLIV_29005
	6488067	-10.5	-	P	SLIV_29060
	6491675	-16.5	-	N	-
	6500468	43.27	+	P	SLIV_29140
	6507089	6.595	+	P	SLIV_29175
	6510816	53.39	+	P	SLIV_29190
	6522121	339.075	+	P	SLIV_29240
	6523641	-15.25	-	P	SLIV_29250
	6526331	-405.495	-	P	SLIV_29265
	6531420	3.15	+	P	SLIV_29285
	6544042	-20.9	-	P	SLIV_29345
	6545406	-7.16	-	P	SLIV_t29360
	6545514	48.635	+	P	SLIV_29365
	6548468	-7	-	P	SLIV_29380
	6548515	6.4	+	P	SLIV_29385
	6552740	14.69	+	P	SLIV_29400
	6558195	12.295	+	P	SLIV_29430
	6560521	-364.12	-	P	SLIV_29435
	6564846	-3.74	-	P	SLIV_29450
	6566113	1685.02	+	P	SLIV_29460
	6570894	27.605	+	P	SLIV_29470
	6573385	-272.045	-	P	SLIV_29475
	6574508	3.15	+	P	SLIV_29485
	6576427	17.215	+	P	SLIV_29490
	6578597	-126.52	-	P	SLIV_29500
	6578654	1318.51	+	P	SLIV_29505
	6583204	410.845	+	P	SLIV_29520
	6587365	551.4	+	P	SLIV_29540
	6589941	91.115	+	P	SLIV_29550
	6590457	211.58	+	P	SLIV_29555
	6593119	4.745	+	S	SLIV_29575
	6593164	29.445	+	P	SLIV_29575
	6597814	5.795	+	P	SLIV_29590
	6605485	-3.11	-	P	SLIV_29625
	6606572	13.64	+	P	SLIV_29635
	6610688	43.38	+	P	SLIV_29645
	6627938	-8.69	-	P	SLIV_29720
	6628023	295.03	+	P	SLIV_29725
	6632060	130.415	+	P	SLIV_29750
	6639176	-235.03	-	P	SLIV_29770
	6640900	-19.175	-	P	SLIV_29780
	6648488	-9.7	-	P	SLIV_29820
	6648580	7.35	+	P	SLIV_29825
	6658141	-26.01	-	P	SLIV_29870
	6658230	17.3	+	P	SLIV_29875
	6663846	-2.8	-	P	SLIV_29895
	6664055	4.2	+	P	SLIV_29900
	6668039	15.515	+	P	SLIV_29930
	6673270	181.095	+	P	SLIV_29955
	6681026	-20.515	-	P	SLIV_29970
	6681756	41.29	+	P	SLIV_29980
	6682948	27.575	+	S	SLIV_29985
	6682978	48.53	+	P	SLIV_29985
	6683859	-3.74	-	P	SLIV_t30010
	6685025	36.07	+	P	SLIV_30020
	6687611	5.25	+	P	SLIV_30035
	6689863	-5.545	-	P	SLIV_30050
	6690005	21.525	+	P	SLIV_30055
	6699139	-12.615	-	P	SLIV_30105
	6701233	5.99	+	P	SLIV_30120
	6705683	-21.6	-	P	SLIV_30130
	6708337	3.15	+	P	SLIV_30140
	6713402	244.855	+	P	SLIV_30170
	6724982	-147.095	-	P	SLIV_30215
	6725955	-47.04	-	P	SLIV_30220
	6725975	3.15	+	P	SLIV_30225
	6730351	1568.23	+	P	SLIV_30245
	6733521	4.2	+	P	SLIV_30255
	6740331	4.18	+	P	SLIV_30285
	6745898	51.59	+	P	SLIV_30315
	6747873	-13.64	-	P	SLIV_30325
	6748050	7.35	+	P	SLIV_30330
	6765529	-9.34	-	P	SLIV_30400
	6768568	-19.92	-	P	SLIV_30415
	6768612	11.55	+	P	SLIV_30420
	6776911	16.995	+	P	SLIV_30445
	6777664	2112.67	+	P	SLIV_30450
	6789002	-10.58	-	P	SLIV_30500
	6789789	3.15	+	P	SLIV_30510
	6799656	128.49	+	P	SLIV_30550
	6812006	6.5	+	P	SLIV_30615
	6814515	7.78	+	P	SLIV_30625
	6814566	5.385	+	S	SLIV_30625
	6816977	17.84	+	P	SLIV_30640
	6819611	9.45	+	P	SLIV_30650
	6821706	-3761.81	-	P	SLIV_30660
	6821897	-94.975	-	S	SLIV_30660
	6833943	30.42	+	P	SLIV_30715
	6848782	-179.655	-	P	SLIV_30750
	6849014	21.63	+	P	SLIV_30755
	6855331	-12.59	-	P	SLIV_30775
	6856353	6.85	+	P	SLIV_30785
	6864824	-27.44	-	P	SLIV_30810
	6864942	27.06	+	P	SLIV_r30815
	6877843	753.2	+	P	SLIV_30865
	6881107	18.645	+	P	SLIV_30885
	6886497	-8.345	-	P	SLIV_30900
	6899930	3.15	+	P	SLIV_30975
	6905165	-6.85	-	P	SLIV_30995
	6915876	-13.82	-	P	SLIV_31040
	6919511	121.595	+	P	SLIV_31060
	6922071	-4.67	-	P	SLIV_31075
	6926479	-5.25	-	P	SLIV_31095
	6927571	-25.355	-	P	SLIV_31105
	6937990	-41.98	-	P	SLIV_31155
	6942105	4.2	+	P	SLIV_31180
	6944355	4.2	+	P	SLIV_31190
	6947306	-10.555	-	P	SLIV_31200
	6947376	7.47	+	P	SLIV_31205
	6949174	-4.98	-	P	SLIV_31215
	6951687	4.05	+	P	SLIV_31235
	6955020	-3.15	-	P	SLIV_31250
	6959787	-2.18	-	P	SLIV_31270
	6969699	-28.54	-	P	SLIV_31310
	6970329	4.2	+	P	SLIV_31320
	6972947	-16.41	-	P	SLIV_31325
	7015217	-17.84	-	P	SLIV_31520
	7019187	-4.2	-	P	SLIV_31540
	7019295	41.395	+	P	SLIV_31545
	7020643	-27.29	-	P	SLIV_31555
	7026782	15.745	+	P	SLIV_31590
	7034658	10.58	+	P	SLIV_31645
	7038253	-15.56	-	P	SLIV_31655
	7047840	-11.55	-	P	SLIV_31685
	7057394	-22.04	-	P	SLIV_31735
	7058638	-1.25	-	P	SLIV_31745
	7058663	32.54	+	S	SLIV_31750
	7058741	91.15	+	P	SLIV_31750
	7071967	7.47	+	P	SLIV_31815
	7072939	6.265	+	P	SLIV_31820
	7075711	-14.735	-	P	SLIV_31835
	7095538	-13.64	-	P	SLIV_31890
	7103433	-40.47	-	P	SLIV_31930
	7105288	10.245	+	A	SLIV_31940
	7108830	-11.55	-	P	SLIV_31950
	7108849	89.48	+	P	SLIV_31955
	7114533	173.775	+	P	SLIV_31970
	7116243	12.76	+	P	SLIV_31985
	7123813	-135.805	-	P	SLIV_32020
	7123863	55.92	+	P	SLIV_32025
	7128851	-4.2	-	P	SLIV_32040
	7130745	-21.225	-	P	SLIV_32055
	7134735	4.2	+	P	SLIV_32070
	7147032	8.09	+	P	SLIV_32130
	7147053	-29.81	-	P	SLIV_32125
	7159531	-3.15	-	P	SLIV_32185
	7159590	16.14	+	P	SLIV_32190
	7162113	-21.135	-	P	SLIV_32200
	7162742	2.1	+	P	SLIV_32210
	7168544	-15.245	-	P	SLIV_32230
	7169745	-68.41	-	P	SLIV_32235
	7187392	-22.475	-	P	SLIV_32325
	7188834	-4.05	-	P	SLIV_32335
	7190247	-19.215	-	P	SLIV_32345
	7190343	4.2	+	P	SLIV_32350
	7195181	-124.735	-	P	SLIV_32370
	7196460	46.65	+	S	SLIV_32385
	7196505	45.19	+	S	SLIV_32385
	7196584	215.205	+	P	SLIV_32385
	7198576	5.02	+	P	SLIV_32395
	7206067	22.61	+	S	SLIV_32430
	7206082	-10.58	-	P	SLIV_32425
	7206135	33.18	+	P	SLIV_32430
	7212527	-30.845	-	P	SLIV_32460
	7221081	3.97	+	P	SLIV_32495
	7235213	2.975	+	P	SLIV_32550
	7242975	-4.2	-	P	SLIV_32585
	7245394	-15.74	-	P	SLIV_32600
	7247960	-4.2	-	P	SLIV_32620
	7253063	-18.16	-	P	SLIV_32645
	7253279	7.33	+	P	SLIV_32650
	7255986	-5.25	-	P	SLIV_32660
	7256113	8.09	+	P	SLIV_32665
	7261809	-45.2	-	P	SLIV_32675
	7263292	17.84	+	P	SLIV_32695
	7266147	-3.74	-	P	SLIV_32700
	7270656	9.65	+	P	SLIV_32725
	7276614	6.3	+	P	SLIV_32745
	7284286	19.735	+	A	SLIV_32770
	7284724	-15.455	-	P	SLIV_32770
	7284772	-14.23	-	S	SLIV_32770
	7286139	3.11	+	P	SLIV_32780
	7297915	421.45	+	P	SLIV_32840
	7302001	-8.4	-	P	SLIV_32860
	7307663	-3.15	-	N	-
	7320060	155.665	+	P	SLIV_32950
	7330904	3.42	+	P	SLIV_33005
	7337249	-78.525	-	P	SLIV_33025
	7340535	18.08	+	P	SLIV_33045
	7341507	8.15	+	P	SLIV_33050
	7345213	-10.5	-	P	SLIV_33065
	7349444	-3.74	-	P	SLIV_33080
	7365236	8.4	+	P	SLIV_33150
	7367382	-4.2	-	P	SLIV_33155
	7367625	3.42	+	P	SLIV_33160
	7383779	-21.255	-	P	SLIV_33220
	7383811	-6.3	-	S	SLIV_33220
	7394079	3.15	+	P	SLIV_33280
	7401250	35.49	+	P	SLIV_33310
	7404889	10.5	+	P	SLIV_33325
	7412046	-4.2	-	P	SLIV_33355
	7418034	-18.89	-	P	SLIV_33380
	7422096	18.08	+	P	SLIV_33410
	7438806	-1.87	-	P	SLIV_33495
	7441175	-29.4	-	P	SLIV_33510
	7441229	21.755	+	P	SLIV_33515
	7443942	68.595	+	P	SLIV_33530
	7451406	-9.65	-	A	SLIV_33560
	7452721	58.885	+	P	SLIV_33570
	7452755	8.9	+	S	SLIV_33570
	7456722	83.025	+	P	SLIV_33585
	7459570	4.36	+	P	SLIV_33605
	7461463	28.08	+	P	SLIV_33615
	7473759	8.4	+	P	SLIV_33670
	7479057	-7.35	-	P	SLIV_33700
	7486876	-3.11	-	P	SLIV_33740
	7487316	5.855	+	P	SLIV_33750
	7507480	-4.05	-	P	SLIV_33855
	7518997	2.49	+	P	SLIV_33905
	7524685	-3.42	-	P	SLIV_33925
	7524737	5.895	+	P	SLIV_33930
	7536788	33.295	+	P	SLIV_33990
	7542350	27.565	+	P	SLIV_34020
	7545139	27.955	+	P	SLIV_34035
	7548711	-4.67	-	P	SLIV_34055
	7548940	6.3	+	P	SLIV_34060
	7550992	-6.3	-	P	SLIV_34070
	7552104	3.42	+	P	SLIV_34085
	7556350	-4.2	-	P	SLIV_34095
	7562269	8.27	+	P	SLIV_34110
	7565331	-1.25	-	P	SLIV_34115
	7565586	3.15	+	P	SLIV_34120
	7575847	-13.7	-	P	SLIV_34165
	7580414	13.7	+	P	SLIV_34180
	7585838	-17.85	-	P	SLIV_34210
	7588149	97.81	+	P	SLIV_34225
	7592468	27.73	+	P	SLIV_34250
	7595981	13.085	+	P	SLIV_34265
	7603940	-4.805	-	P	SLIV_34310
	7626615	13.765	+	P	SLIV_34410
	7628959	-22.615	-	P	SLIV_34420
	7632630	39.81	+	P	SLIV_34445
	7633899	-4.36	-	P	SLIV_34450
	7634654	9.72	+	P	SLIV_34460
	7636207	-7.74	-	P	SLIV_34470
	7645638	14.37	+	P	SLIV_34515
	7649339	-157.45	-	P	SLIV_34535
	7651290	20.23	+	N	-
	7655334	-8.63	-	P	SLIV_34560
	7659788	13.64	+	P	SLIV_34575
	7660684	-36.315	-	P	SLIV_34580
	7690532	-280.16	-	P	SLIV_34735
	7690558	3.15	+	P	SLIV_34740
	7695402	-9.31	-	P	SLIV_34760
	7698864	3.42	+	P	SLIV_34795
	7702792	-10.5	-	A	SLIV_34810
	7713728	7.35	+	P	SLIV_34860
	7725063	-7.35	-	P	SLIV_34910
	7732593	-7.485	-	S	SLIV_34945
	7732624	-62.88	-	P	SLIV_34945
	7734136	11.67	+	P	SLIV_34960
	7735211	-76.45	-	P	SLIV_34965
	7737656	5.25	+	P	SLIV_34985
	7741415	9.65	+	P	SLIV_35005
	7755324	-13.64	-	P	SLIV_35070
	7760061	280.02	+	P	SLIV_35095
	7760785	-3.15	-	N	-
	7767441	-17.03	-	P	SLIV_35130
	7784441	28.975	+	P	SLIV_35210
	7793303	-3.15	-	P	SLIV_35225
	7802051	6.3	+	P	SLIV_35265
	7812222	329.735	+	P	SLIV_35310
	7814374	-9.65	-	P	SLIV_35320
	7815422	-24.14	-	P	SLIV_35325
	7823556	-8.985	-	P	SLIV_35375
	7838892	-18.37	-	P	SLIV_35445
	7839014	4.05	+	P	SLIV_35450
	7843505	6.3	+	P	SLIV_35470
	7846417	14.835	+	P	SLIV_35480
	7864604	4.28	+	P	SLIV_35510
	7880992	4.67	+	P	SLIV_35600
	7890426	-3.42	-	P	SLIV_35645
	7905393	-9.065	-	P	SLIV_35710
	7909962	-4.2	-	P	SLIV_35740
	7926918	-4.2	-	P	SLIV_35815
	7937682	32.84	+	P	SLIV_35870
	7938749	15.22	+	P	SLIV_35875
	7940049	-64.8	-	P	SLIV_35885
	7941343	11.04	+	P	SLIV_35895
	7943751	-16.35	-	P	SLIV_35905
	7944528	133.44	+	P	SLIV_35915
	7977890	-604	-	P	SLIV_36045
	7983759	-3.15	-	P	SLIV_36070
	8003384	2.8	+	P	SLIV_36130
	8013089	-5.075	-	P	SLIV_36175
	8047606	-18.16	-	P	SLIV_36310
	8064364	22.12	+	P	SLIV_36370
	8072660	-6.3	-	P	SLIV_36395
	8072723	3.15	+	P	SLIV_36400
	8078343	3.15	+	P	SLIV_36425
	8081278	-6.3	-	P	SLIV_36435
	8092402	55.445	+	P	SLIV_36485
	8094909	-4.65	-	P	SLIV_36490
	8102174	9.96	+	P	SLIV_36530
	8115654	-10.67	-	P	SLIV_36575
	8118396	-32.445	-	P	SLIV_36590
	8118949	-17.595	-	P	SLIV_36595
	8121065	-26.46	-	P	SLIV_36605
	8121155	35.01	+	P	SLIV_36610
	8122235	-9.95	-	P	SLIV_36615
	8126087	2.49	+	P	SLIV_36640
	8128108	13.64	+	P	SLIV_36645
	8129676	-6.85	-	P	SLIV_36650
	8135132	5.075	+	N	-
	8135335	-584.7	-	P	SLIV_36670
	8135359	5.91	+	P	SLIV_36675
	8140926	-11.21	-	P	SLIV_36700
	8143722	7.975	+	P	SLIV_36715
	8148103	28.85	+	A	SLIV_36735
	8150544	65.25	+	N	-
	8152730	-60.545	-	P	SLIV_36765
	8153954	13.765	+	P	SLIV_36780
	8157093	-23.35	-	P	SLIV_36790
	8167621	-10.27	-	P	SLIV_36830
	8167824	2.665	+	P	SLIV_36835
	8176608	13.61	+	P	SLIV_36875
	8187233	-40.47	-	P	SLIV_36925
	8187301	115.45	+	P	SLIV_36930
	8202474	10.05	+	A	SLIV_36985
	8204075	23.09	+	P	SLIV_36995
	8212692	2.49	+	P	SLIV_37045
	8216346	6.23	+	P	SLIV_37070
	8220213	3.655	+	P	SLIV_37090
	8222539	-148.415	-	P	SLIV_37100
	8223193	47.4	+	P	SLIV_37105
	8236046	-8.4	-	P	SLIV_37155
	8242592	-34.48	-	P	SLIV_37190
	8245446	9.18	+	P	SLIV_37215
	8247400	52.82	+	P	SLIV_37220
	8281590	2.8	+	P	SLIV_37310
	8283228	2.8	+	P	SLIV_37320
	8285608	-62.035	-	P	SLIV_37325
	8286669	2.1	+	P	SLIV_37335
	8293002	3.97	+	N	-
	8298551	-10.5	-	P	SLIV_37390
	8299217	14.355	+	I	SLIV_37395
	8300909	55.845	+	N	-
