# Supplementary material for: The Transcription Unit Architecture of Streptomyces lividans TK24
Source: Front Microbiol. 2019 Sep 6;10:2074. doi: 10.3389/fmicb.2019.02074 (PMC6742748; doi:10.3389/fmicb.2019.02074)
Supplement: Supplementary file 7 [file Table_6.XLSX]

## Sheet: Sheet1
	Supplementary Dataset 3. TEPs identified from Term-Seq.
	Position	Intensity	Strand	Category	Associated gene
	67368	-1.37277	-	P	SLIV_00320
	69102	-0.440193	-	N	-
	80859	-1.75339	-	P	SLIV_00400
	92916	1.17928	+	P	SLIV_00465
	93437	0.380618	+	N	-
	93741	0.335809	+	N	-
	129514	-1.33585	-	C	SLIV_00650
	141497	-0.701152	-	A	SLIV_00715
	142430	2.47032	+	P	SLIV_00720
	152725	-0.291001	-	C	SLIV_00780
	154847	-8.42527	-	P	SLIV_00795
	157187	-0.485001	-	P	SLIV_00805
	159650	-3.20839	-	S	SLIV_00815
	160085	-8.14419	-	P	SLIV_00815
	162817	1.9843	+	P	SLIV_00825
	211629	-0.291001	-	A	SLIV_01025
	212042	-0.895152	-	S	SLIV_01030
	212227	-12.9833	-	P	SLIV_01030
	222341	-1.08966	-	P	SLIV_01080
	223432	-1.21619	-	P	SLIV_01085
	236919	-5.99288	-	P	SLIV_01155
	239976	1.71647	+	S	SLIV_01160
	240301	2.41813	+	P	SLIV_01160
	270468	0.477618	+	P	SLIV_01310
	325159	0.917811	+	P	SLIV_01560
	325760	0.887769	+	P	SLIV_01565
	340006	-2.75496	-	P	SLIV_01630
	365848	-4.88056	-	P	SLIV_01730
	373131	58.266	+	P	SLIV_01760
	375787	1.15662	+	C	SLIV_01775
	404082	1.77605	+	S	SLIV_01900
	404215	3.15671	+	P	SLIV_01900
	404311	1.17139	+	S	SLIV_01900
	409600	-0.291001	-	P	SLIV_01930
	411011	-1.22358	-	P	SLIV_01935
	418273	-1.52247	-	P	SLIV_01975
	419483	-19.2386	-	C	SLIV_01975
	422299	-0.790769	-	C	SLIV_01995
	451009	-0.768618	-	P	SLIV_02140
	482785	0.477618	+	P	SLIV_02290
	488918	0.447576	+	P	SLIV_02320
	503154	-0.716427	-	P	SLIV_02395
	590067	-0.656852	-	P	SLIV_02800
	590196	-0.485001	-	S	SLIV_02800
	613132	-0.567235	-	P	SLIV_02910
	613217	2.44079	+	P	SLIV_02905
	619952	-1.75339	-	P	SLIV_02955
	620130	0.388001	+	P	SLIV_02950
	623243	0.492385	+	P	SLIV_02970
	634648	-3.17937	-	S	SLIV_03035
	634925	-3.33696	-	P	SLIV_03035
	636667	3.28273	+	N	-
	636774	0.783385	+	C	SLIV_03040
	637982	0.776002	+	P	SLIV_03040
	639976	-0.425426	-	S	SLIV_03050
	640101	-0.574618	-	P	SLIV_03050
	642263	-1.09704	-	P	SLIV_03065
	657002	-3.47087	-	P	SLIV_03130
	678453	-0.641577	-	C	SLIV_03215
	680752	-1.23147	-	P	SLIV_03230
	681797	-6.72306	-	N	-
	692795	-0.291001	-	P	SLIV_03285
	696876	0.903044	+	P	SLIV_03300
	710877	-0.335809	-	P	SLIV_03355
	718747	1.11232	+	P	SLIV_03390
	729222	0.343192	+	P	SLIV_03425
	756846	-1.61158	-	P	SLIV_03540
	758118	-1.92575	-	P	SLIV_03545
	807059	0.544576	+	P	SLIV_03765
	810935	-15.198	-	N	-
	829600	-2.00009	-	P	SLIV_03865
	839742	-0.440193	-	N	-
	849088	-0.440193	-	N	-
	853257	1.57466	+	P	SLIV_03965
	861788	0.55196	+	P	SLIV_04010
	907960	0.656852	+	P	SLIV_04175
	909442	0.485001	+	P	SLIV_04180
	928558	49.3082	+	P	SLIV_04245
	973441	0.425426	+	P	SLIV_04455
	986396	-0.664235	-	P	SLIV_04530
	1010292	-0.52981	-	P	SLIV_04635
	1016131	-0.835577	-	P	SLIV_04665
	1025285	-1.04485	-	C	SLIV_04695
	1027221	1.57415	+	A	SLIV_04705
	1029953	-0.544576	-	C	SLIV_04720
	1030255	-12.1439	-	P	SLIV_04725
	1041031	-0.596768	-	P	SLIV_04780
	1055458	0.499768	+	P	SLIV_04830
	1066320	0.761235	+	P	SLIV_04885
	1068268	0.335809	+	P	SLIV_04900
	1069193	0.895152	+	N	-
	1100216	1.04485	+	P	SLIV_05035
	1102841	-26.1977	-	P	SLIV_05055
	1122750	-451.273	-	P	SLIV_05105
	1151350	0.671618	+	P	SLIV_05220
	1154131	-0.693768	-	P	SLIV_05235
	1155279	-0.447576	-	P	SLIV_05245
	1166606	-0.619426	-	P	SLIV_05290
	1168652	-6.73349	-	P	SLIV_05310
	1168687	2480.9	+	P	SLIV_05300
	1170851	-2.6185	-	P	SLIV_05315
	1172847	-0.574618	-	P	SLIV_05320
	1187532	-0.440193	-	P	SLIV_05390
	1189748	-0.380618	-	P	SLIV_05400
	1189793	1.19404	+	P	SLIV_05395
	1205573	0.470234	+	P	SLIV_05450
	1209762	1.79081	+	P	SLIV_05460
	1212568	0.522426	+	P	SLIV_05470
	1214896	-0.335809	-	S	SLIV_t05480
	1214972	-0.388001	-	S	SLIV_t05480
	1215234	-14.2369	-	P	SLIV_t05480
	1222314	-0.335809	-	A	SLIV_05505
	1222504	-0.738577	-	A	SLIV_05510
	1247911	-4.08928	-	P	SLIV_05600
	1267992	2.52201	+	P	SLIV_05675
	1277879	-1.5077	-	P	SLIV_05705
	1292073	-167.527	-	P	SLIV_05770
	1316689	0.62681	+	S	SLIV_05880
	1316716	1.38855	+	P	SLIV_05880
	1329062	2.08283	+	P	SLIV_05960
	1343484	-69.5509	-	P	SLIV_06015
	1352305	1.23147	+	P	SLIV_06055
	1359561	1.5072	+	P	SLIV_06085
	1360429	43.8382	+	P	SLIV_06090
	1378934	-1.12658	-	P	SLIV_06170
	1393218	-0.388001	-	P	SLIV_06235
	1413351	-0.432809	-	A	SLIV_06285
	1475983	0.470234	+	P	SLIV_06540
	1478710	0.291001	+	P	SLIV_06555
	1484545	-1.97743	-	P	SLIV_06600
	1514346	19.7672	+	P	SLIV_06735
	1514405	-0.955236	-	P	SLIV_06740
	1517986	-0.291001	-	S	SLIV_06750
	1518131	-62.3176	-	P	SLIV_06750
	1521513	-2.04439	-	P	SLIV_06760
	1555120	1.5072	+	P	SLIV_06780
	1564441	0.977386	+	A	SLIV_06815
	1564592	0.72381	+	A	SLIV_06815
	1565529	1.67905	+	P	SLIV_06820
	1565541	-1.09704	-	P	SLIV_06825
	1565757	0.343192	+	S	SLIV_06820
	1590337	1.63475	+	P	SLIV_06930
	1592740	0.634193	+	P	SLIV_06940
	1613384	-1.6042	-	P	SLIV_07040
	1627894	-0.343192	-	P	SLIV_07070
	1632940	-3.45611	-	P	SLIV_07095
	1641407	-0.977894	-	P	SLIV_07140
	1643733	-8.15794	-	P	SLIV_07145
	1648467	67.757	+	P	SLIV_07150
	1674637	1.48505	+	P	SLIV_07255
	1674710	0.388001	+	S	SLIV_07255
	1674929	0.343192	+	S	SLIV_07255
	1695700	1.67854	+	P	SLIV_07345
	1706060	-1.09704	-	S	SLIV_07395
	1706143	-1.82085	-	P	SLIV_07395
	1723464	-0.887769	-	P	SLIV_07485
	1723826	12.3536	+	P	SLIV_07480
	1725294	0.865619	+	P	SLIV_07495
	1749205	-35.1352	-	N	-
	1753024	4.69242	+	P	SLIV_07620
	1753274	0.984769	+	C	SLIV_07625
	1797678	-1.86617	-	P	SLIV_07815
	1801262	0.395384	+	A	SLIV_07830
	1801554	-6.54433	-	P	SLIV_07835
	1803406	-13.5304	-	P	SLIV_07845
	1806506	3.40977	+	P	SLIV_07855
	1810111	0.522426	+	P	SLIV_07875
	1810137	0.380618	+	S	SLIV_07875
	1820720	-1.5072	-	P	SLIV_07930
	1825323	-0.335809	-	S	SLIV_07950
	1825468	-1.07439	-	P	SLIV_07950
	1837579	0.634193	+	C	SLIV_08005
	1842289	1.01481	+	P	SLIV_08015
	1861627	-1.94051	-	P	SLIV_08080
	1863834	-1.552	-	P	SLIV_08090
	1865043	-0.589385	-	P	SLIV_08095
	1866550	-0.388001	-	P	SLIV_08100
	1870041	-0.485001	-	C	SLIV_08110
	1875267	-0.425426	-	A	SLIV_08120
	1875403	-0.52981	-	S	SLIV_08130
	1875454	-0.768618	-	S	SLIV_08130
	1875709	-1.91047	-	P	SLIV_08130
	1876515	-22.3421	-	P	SLIV_08140
	1881299	-0.440193	-	A	SLIV_08145
	1881407	-2.09658	-	N	-
	1881455	2.85094	+	P	SLIV_08145
	1881912	-4.33497	-	N	-
	1881967	3.19362	+	P	SLIV_08150
	1882153	-0.291001	-	P	SLIV_08155
	1883246	0.432809	+	A	SLIV_08155
	1887079	-1.32109	-	P	SLIV_08175
	1887191	-1.22358	-	S	SLIV_08175
	1893819	6.35975	+	P	SLIV_08195
	1902724	0.395384	+	N	-
	1902822	0.432809	+	N	-
	1915657	0.716427	+	P	SLIV_08295
	1931849	0.380618	+	P	SLIV_08395
	1933952	1.38804	+	P	SLIV_08410
	1942068	-1.00004	-	N	-
	1942084	34.7457	+	N	-
	1943551	-0.776002	-	P	SLIV_08475
	1963163	-4.77516	-	P	SLIV_08580
	1963587	0.634193	+	P	SLIV_08575
	1976617	-0.425426	-	P	SLIV_08640
	1980135	-0.343192	-	P	SLIV_08660
	1981141	-0.291001	-	A	SLIV_08670
	2002461	-5.52901	-	P	SLIV_08760
	2006025	-1.164	-	P	SLIV_08780
	2055984	0.74596	+	C	SLIV_09000
	2056268	2.91153	+	P	SLIV_09000
	2060946	-59.0255	-	N	-
	2071791	1.21619	+	A	SLIV_09075
	2075603	1.02219	+	P	SLIV_09085
	2076069	-0.589385	-	A	SLIV_09090
	2080636	-2.79875	-	P	SLIV_09110
	2081702	-9.0009	-	P	SLIV_09115
	2101992	1.62635	+	P	SLIV_09170
	2107511	-0.679002	-	S	SLIV_09205
	2107759	-2.94743	-	P	SLIV_09205
	2115075	1.91836	+	P	SLIV_09230
	2120604	-0.619426	-	S	SLIV_09260
	2120665	-0.776002	-	P	SLIV_09260
	2124574	-0.641577	-	P	SLIV_09290
	2127047	0.880894	+	N	-
	2127329	24.4664	+	P	SLIV_09300
	2133730	13.5131	+	C	SLIV_09330
	2142549	-0.649468	-	P	SLIV_09370
	2151527	13.8776	+	C	SLIV_09400
	2151935	-0.888277	-	P	SLIV_09405
	2151977	4.92537	+	P	SLIV_09400
	2152854	-8.14165	-	P	SLIV_09410
	2153667	-6.70142	-	C	SLIV_09410
	2160918	0.291001	+	N	-
	2161916	1.22409	+	P	SLIV_09440
	2172799	-7.46418	-	P	SLIV_09495
	2175319	8.9752	+	N	-
	2175661	60.5785	+	P	SLIV_09500
	2175771	1.45551	+	S	SLIV_09500
	2175990	0.813427	+	S	SLIV_09500
	2176723	-3.58901	-	P	SLIV_09510
	2178349	-14.5106	-	C	SLIV_09510
	2178633	-1.10443	-	S	SLIV_09515
	2178670	-1.5072	-	P	SLIV_09515
	2187707	-0.485001	-	P	SLIV_09550
	2189402	-0.432809	-	P	SLIV_09560
	2190176	-1.00004	-	N	-
	2195142	-5.25481	-	P	SLIV_09590
	2195176	0.388001	+	P	SLIV_09585
	2200210	3.66386	+	P	SLIV_09600
	2209722	1.35062	+	P	SLIV_09630
	2211398	0.388001	+	N	-
	2215415	-0.589385	-	P	SLIV_09650
	2231234	2.17143	+	P	SLIV_09730
	2232211	25.2259	+	P	SLIV_09735
	2233903	31.6671	+	P	SLIV_09745
	2241129	-0.939961	-	P	SLIV_09785
	2252309	-10.5381	-	P	SLIV_09840
	2255720	-2.36594	-	P	SLIV_09860
	2256704	-0.72381	-	P	SLIV_09865
	2260598	-1.02958	-	C	SLIV_09870
	2269774	-1333.96	-	P	SLIV_t09885
	2269871	-1.48454	-	P	SLIV_09890
	2274151	-218.452	-	P	SLIV_r09905
	2276312	-8.70049	-	P	SLIV_09910
	2278037	-12.3432	-	P	SLIV_09915
	2279140	-15.5979	-	P	SLIV_09920
	2281143	1.14924	+	P	SLIV_09930
	2286286	-132.208	-	P	SLIV_09955
	2286644	-1.843	-	C	SLIV_09955
	2286928	-0.485001	-	P	SLIV_09965
	2287241	10.768	+	P	SLIV_09960
	2288853	-0.686385	-	C	SLIV_09965
	2292611	-0.380618	-	A	SLIV_09970
	2292715	-0.544576	-	A	SLIV_09970
	2293163	-67.2774	-	P	SLIV_09975
	2297003	-1.15662	-	P	SLIV_09995
	2298493	-1.25362	-	C	SLIV_10000
	2302297	0.485001	+	P	SLIV_10015
	2302930	-0.343192	-	P	SLIV_10025
	2303128	0.537193	+	P	SLIV_10020
	2308741	0.947344	+	P	SLIV_10040
	2311849	2.13451	+	P	SLIV_10045
	2323747	-6.84908	-	P	SLIV_10085
	2325223	-1.29843	-	P	SLIV_10095
	2325657	-40.9476	-	P	SLIV_10100
	2328810	-12.0512	-	N	-
	2331294	1.00743	+	N	-
	2337286	-0.671618	-	S	SLIV_10145
	2337361	-1.58943	-	S	SLIV_10145
	2337464	-8.38683	-	P	SLIV_10145
	2338793	-1.87305	-	P	SLIV_10150
	2361526	-3.81356	-	P	SLIV_10230
	2369058	8.72315	+	P	SLIV_10245
	2372594	-0.925194	-	P	SLIV_10265
	2381375	-0.440193	-	P	SLIV_10305
	2387708	-27.8128	-	P	SLIV_10340
	2391315	1.41809	+	S	SLIV_10350
	2391348	20.3194	+	P	SLIV_10350
	2395540	0.62681	+	P	SLIV_10370
	2396293	15.7461	+	P	SLIV_10375
	2401040	-2.26105	-	P	SLIV_10400
	2405200	-10.351	-	P	SLIV_10410
	2407133	-3.50678	-	C	SLIV_10415
	2407995	-38.1246	-	C	SLIV_10420
	2408103	-17.8875	-	P	SLIV_10425
	2410094	-1.17139	-	C	SLIV_10430
	2419198	-0.291001	-	N	-
	2419536	-0.335809	-	N	-
	2420818	-28.5275	-	P	SLIV_10495
	2421244	-1.43285	-	C	SLIV_10495
	2422805	-8.97672	-	P	SLIV_10510
	2423100	-9.15748	-	P	SLIV_10515
	2423552	-10.4012	-	C	SLIV_10515
	2423767	-3.32805	-	P	SLIV_10520
	2426937	0.933086	+	P	SLIV_10530
	2428720	-0.753343	-	P	SLIV_10540
	2432949	-0.515043	-	P	SLIV_10550
	2434904	-51.8966	-	P	SLIV_10560
	2440619	-13.0716	-	P	SLIV_10580
	2442311	-0.291001	-	P	SLIV_10585
	2446098	-49.811	-	P	SLIV_10590
	2446130	1.03696	+	N	-
	2448534	0.335809	+	P	SLIV_10600
	2450742	-3.4472	-	P	SLIV_10620
	2458430	3.98388	+	C	SLIV_10655
	2458740	660.416	+	P	SLIV_10655
	2461110	-5.99976	-	P	SLIV_10675
	2461148	4.4699	+	P	SLIV_10670
	2465273	-3.53834	-	P	SLIV_10700
	2466076	-1.90309	-	P	SLIV_10705
	2466649	-1.47715	-	P	SLIV_10710
	2470989	-2.91739	-	P	SLIV_t10735
	2471151	-414.246	-	P	SLIV_t10740
	2471240	-221.404	-	P	SLIV_t10745
	2471375	-61.6379	-	P	SLIV_t10750
	2471490	-972.187	-	P	SLIV_t10755
	2471563	-0.544576	-	C	SLIV_t10755
	2472938	-0.60466	-	P	SLIV_10770
	2475223	-0.753852	-	P	SLIV_10780
	2476042	2.63428	+	C	SLIV_10785
	2481718	15.0065	+	P	SLIV_10800
	2485746	2.02224	+	P	SLIV_10810
	2486964	1.7012	+	P	SLIV_10820
	2489049	-0.574618	-	C	SLIV_10830
	2492285	1.54462	+	P	SLIV_10840
	2497125	-0.544576	-	C	SLIV_10860
	2504314	-1.38804	-	P	SLIV_10895
	2505925	-1.02219	-	P	SLIV_10905
	2512131	-1.17928	-	P	SLIV_10930
	2512205	-0.70166	-	S	SLIV_10930
	2514033	-6.05246	-	P	SLIV_10935
	2515153	-1.05962	-	P	SLIV_10940
	2517653	-1.86515	-	P	SLIV_10950
	2521102	-0.887769	-	S	SLIV_10955
	2521300	-3.69339	-	P	SLIV_10955
	2524691	-0.567235	-	P	SLIV_10970
	2528546	-0.425426	-	S	SLIV_10985
	2528577	-0.656343	-	P	SLIV_10985
	2539583	-0.537193	-	P	SLIV_11035
	2552002	-3.08873	-	P	SLIV_11105
	2555745	-21.297	-	P	SLIV_11120
	2557153	0.291001	+	A	SLIV_11120
	2557666	-1.92524	-	P	SLIV_11125
	2561934	6.67087	+	C	SLIV_11145
	2563175	0.485001	+	P	SLIV_11145
	2564934	34.5484	+	P	SLIV_11155
	2566393	0.634193	+	P	SLIV_11160
	2568900	-0.656852	-	A	SLIV_11175
	2569092	-1.77605	-	P	SLIV_11180
	2569189	-0.873002	-	S	SLIV_11180
	2569459	1.88043	+	P	SLIV_11175
	2570207	-158.698	-	P	SLIV_11185
	2572034	-6.07511	-	P	SLIV_11200
	2572779	-0.477618	-	P	SLIV_11205
	2573379	-2.05915	-	C	SLIV_11205
	2573519	-6.43206	-	P	SLIV_11210
	2619582	-0.634193	-	A	SLIV_11360
	2621451	-0.440193	-	S	SLIV_11375
	2621662	-1.29843	-	P	SLIV_11375
	2627768	6.48781	+	P	SLIV_11390
	2628124	0.343192	+	S	SLIV_11390
	2629852	-15.892	-	P	SLIV_11405
	2630679	-8.1027	-	C	SLIV_11405
	2630875	-3.20101	-	S	SLIV_11410
	2631068	-4.53584	-	P	SLIV_11410
	2632175	-0.619426	-	C	SLIV_11410
	2632341	0.753852	+	N	-
	2637023	-20.9128	-	P	SLIV_11435
	2638010	-0.432809	-	P	SLIV_11445
	2641620	100.313	+	P	SLIV_11470
	2645818	-0.72381	-	P	SLIV_11495
	2648435	-0.84296	-	C	SLIV_11500
	2649104	1.82824	+	P	SLIV_11505
	2653234	0.679002	+	P	SLIV_11510
	2654344	1.20143	+	P	SLIV_11515
	2658506	37.2522	+	P	SLIV_11535
	2660079	-56.4712	-	P	SLIV_11550
	2660135	1.81296	+	P	SLIV_11545
	2661571	0.52981	+	P	SLIV_11555
	2664921	-2.27581	-	P	SLIV_11570
	2673621	-0.477618	-	P	SLIV_11615
	2673777	0.582001	+	P	SLIV_11610
	2674210	-2.94056	-	P	SLIV_11620
	2674733	-243.614	-	P	SLIV_11625
	2677168	-6.2154	-	P	SLIV_11635
	2678832	-12.8562	-	P	SLIV_11640
	2680627	-6.02241	-	P	SLIV_11655
	2681607	-2.35754	-	P	SLIV_11660
	2682165	-0.731193	-	C	SLIV_11660
	2688628	-507.545	-	P	SLIV_11695
	2690588	-69.389	-	P	SLIV_11705
	2692850	-3.2089	-	P	SLIV_11710
	2694284	-0.738577	-	P	SLIV_11715
	2700255	391.425	+	P	SLIV_t11740
	2728018	-1.40332	-	P	SLIV_11895
	2729372	-0.82081	-	P	SLIV_11900
	2736909	-1.90309	-	P	SLIV_11935
	2736919	0.850852	+	P	SLIV_11930
	2746390	1.93313	+	P	SLIV_11955
	2754573	-2.01435	-	P	SLIV_11985
	2773487	-31.3066	-	P	SLIV_12055
	2778571	-0.79866	-	A	SLIV_12070
	2779464	1.88043	+	P	SLIV_12075
	2782035	11.1723	+	P	SLIV_12095
	2783738	-8.26029	-	P	SLIV_12115
	2785120	-77.1651	-	P	SLIV_12120
	2790480	1.32847	+	P	SLIV_12140
	2792226	1.36539	+	P	SLIV_12150
	2794062	3.40977	+	C	SLIV_12165
	2794481	127.547	+	P	SLIV_12165
	2796147	-240.9	-	P	SLIV_12175
	2798973	0.582001	+	P	SLIV_12185
	2807926	12.1393	+	C	SLIV_12230
	2811577	12.3353	+	P	SLIV_12235
	2815347	-27.7937	-	P	SLIV_12260
	2817172	-0.291001	-	P	SLIV_12270
	2819874	-2.39547	-	P	SLIV_12280
	2826478	0.582001	+	P	SLIV_12315
	2829373	1.7982	+	P	SLIV_t12340
	2829418	0.918319	+	S	SLIV_t12340
	2831487	-10.9646	-	P	SLIV_t12350
	2831655	-5.40248	-	P	SLIV_12355
	2834833	-0.977386	-	C	SLIV_12355
	2835573	4.71609	+	P	SLIV_12360
	2835665	1.03009	+	S	SLIV_12360
	2835877	0.522426	+	S	SLIV_12360
	2838768	0.738577	+	C	SLIV_12385
	2840253	0.62681	+	P	SLIV_12385
	2840806	1.552	+	P	SLIV_12390
	2847694	0.522426	+	P	SLIV_12420
	2848550	-61.8724	-	P	SLIV_12435
	2848941	-0.582001	-	C	SLIV_12435
	2851819	13.7628	+	P	SLIV_12445
	2868525	-37.9625	-	P	SLIV_12490
	2868580	1.14924	+	P	SLIV_12485
	2869817	-1.14185	-	P	SLIV_12495
	2874855	-0.977386	-	P	SLIV_12515
	2879088	0.440193	+	P	SLIV_12530
	2879428	32.5388	+	P	SLIV_12535
	2879578	0.574618	+	S	SLIV_12535
	2886420	2.67272	+	P	SLIV_12565
	2886424	-1.52985	-	P	SLIV_12570
	2887030	-0.671618	-	P	SLIV_12575
	2891179	1.11919	+	C	SLIV_12595
	2897193	-1.3137	-	P	SLIV_12625
	2897233	3.02228	+	P	SLIV_12620
	2898109	-0.768618	-	P	SLIV_12630
	2903545	-114.465	-	P	SLIV_12655
	2903780	-0.731193	-	C	SLIV_12655
	2905009	0.335809	+	P	SLIV_12660
	2907223	-0.761235	-	A	SLIV_12675
	2907328	-0.634193	-	S	SLIV_12680
	2907779	-1.38066	-	P	SLIV_12680
	2912937	-14.8673	-	P	SLIV_12705
	2919100	-7.93339	-	P	SLIV_12740
	2924070	-32.1269	-	P	SLIV_12765
	2926786	0.933086	+	P	SLIV_12770
	2933700	-0.52981	-	P	SLIV_12805
	2935845	-39.0788	-	P	SLIV_12815
	2938971	-1.35062	-	C	SLIV_12820
	2940971	0.388001	+	A	SLIV_12825
	2953774	-0.776002	-	P	SLIV_12880
	2976185	-1.17928	-	P	SLIV_13000
	2994011	-0.604151	-	S	SLIV_13080
	2994377	-25.4693	-	P	SLIV_13080
	2994420	1.00743	+	P	SLIV_13075
	3009315	-0.850852	-	P	SLIV_13155
	3012498	16.4572	+	P	SLIV_13165
	3015562	1.54462	+	P	SLIV_13175
	3016618	1.164	+	P	SLIV_13180
	3028839	6.4537	+	P	SLIV_13230
	3028907	5.67387	+	S	SLIV_13230
	3030419	-248.634	-	P	SLIV_13240
	3031286	-22.0623	-	C	SLIV_13240
	3031541	-27.0967	-	P	SLIV_13245
	3033025	-0.335809	-	N	-
	3033155	-0.716427	-	N	-
	3033385	-35.5085	-	N	-
	3038054	-0.731193	-	P	SLIV_13270
	3046723	-0.686385	-	C	SLIV_13325
	3059888	1.00004	+	P	SLIV_13405
	3061573	-0.380618	-	P	SLIV_13420
	3064302	-1.17139	-	P	SLIV_13430
	3066619	-3.82985	-	P	SLIV_13440
	3074410	1.05962	+	P	SLIV_13475
	3077894	-0.432809	-	P	SLIV_13500
	3089979	-0.917811	-	C	SLIV_13540
	3095409	0.582001	+	P	SLIV_13560
	3096023	38.4421	+	P	SLIV_13565
	3098095	-0.52981	-	P	SLIV_13580
	3100161	0.768618	+	P	SLIV_13585
	3100963	-3.50041	-	P	SLIV_13600
	3103891	0.291001	+	P	SLIV_13605
	3105482	1.72385	+	P	SLIV_13615
	3107513	-0.343192	-	A	SLIV_13635
	3111974	-52.1505	-	P	SLIV_13650
	3122079	-20.9299	-	P	SLIV_13700
	3123533	-7.02398	-	P	SLIV_13705
	3124477	1.02219	+	P	SLIV_13710
	3136212	-0.447576	-	A	SLIV_13770
	3136754	6.81318	+	P	SLIV_13770
	3137952	-1.1197	-	P	SLIV_13780
	3142948	1.53775	+	P	SLIV_13795
	3146281	0.492385	+	P	SLIV_13810
	3147227	-0.62681	-	P	SLIV_13820
	3147270	3.12768	+	P	SLIV_13815
	3150745	-4.63437	-	P	SLIV_13835
	3150765	0.55196	+	P	SLIV_13830
	3155817	1.64213	+	P	SLIV_13860
	3156292	-19.603	-	P	SLIV_13870
	3163715	0.567235	+	P	SLIV_13900
	3172515	-14.9897	-	P	SLIV_13950
	3173873	-71.26	-	P	SLIV_13955
	3176492	-0.634193	-	P	SLIV_13965
	3189587	2.85094	+	P	SLIV_14010
	3195569	-4.79094	-	P	SLIV_14040
	3203987	0.746468	+	P	SLIV_14080
	3205034	2.51462	+	P	SLIV_14090
	3207631	66.0946	+	P	SLIV_14100
	3208375	3.19413	+	P	SLIV_14105
	3211891	-0.806044	-	C	SLIV_14130
	3219434	-0.746468	-	P	SLIV_14175
	3230989	0.582001	+	A	SLIV_14225
	3231695	-0.485001	-	P	SLIV_14230
	3233449	-37.2145	-	P	SLIV_14235
	3234676	-1.26839	-	P	SLIV_14240
	3236400	-0.768618	-	S	SLIV_14245
	3236539	-0.388001	-	S	SLIV_14245
	3236619	-3.05182	-	P	SLIV_14245
	3238992	62.8989	+	P	SLIV_14255
	3241691	-5.0962	-	A	SLIV_14265
	3242370	12.6755	+	P	SLIV_14270
	3254690	-3.52994	-	P	SLIV_14320
	3255659	-6.83635	-	P	SLIV_14325
	3266965	-1.91047	-	P	SLIV_14360
	3267765	0.343192	+	N	-
	3270722	-0.693768	-	P	SLIV_14375
	3270757	0.649468	+	P	SLIV_14370
	3277903	1.02958	+	P	SLIV_14395
	3285001	-17.1227	-	P	SLIV_14440
	3287659	53.454	+	C	SLIV_14450
	3300565	-1.55939	-	P	SLIV_14485
	3306165	-438.519	-	P	SLIV_14505
	3306252	12.0718	+	P	SLIV_14495
	3306461	8.6488	+	S	SLIV_14495
	3306582	-10.0183	-	S	SLIV_14505
	3307827	-31.7509	-	P	SLIV_14510
	3310335	-5.31337	-	P	SLIV_14520
	3315871	-53.0743	-	P	SLIV_14550
	3317602	-651.16	-	P	SLIV_14555
	3317999	-4.3729	-	P	SLIV_14560
	3337395	-0.432809	-	P	SLIV_14665
	3340378	-0.731193	-	P	SLIV_14680
	3342188	-166.456	-	P	SLIV_14685
	3343298	-2.02911	-	C	SLIV_14690
	3346551	-26.4632	-	P	SLIV_14710
	3347250	-27.9556	-	P	SLIV_14715
	3348450	-337.376	-	P	SLIV_14720
	3348942	-10.1122	-	P	SLIV_14725
	3349729	-74.6757	-	P	SLIV_14740
	3351043	-19.0296	-	P	SLIV_14745
	3353247	-1160.61	-	P	SLIV_14755
	3354997	-10.9536	-	P	SLIV_14775
	3356109	-138.16	-	P	SLIV_14785
	3357244	-12.0364	-	P	SLIV_14800
	3357636	-49.8894	-	P	SLIV_14805
	3359841	-9.19236	-	P	SLIV_14830
	3361029	-19.148	-	P	SLIV_14840
	3362787	-6.29763	-	P	SLIV_14855
	3363135	-128.461	-	C	SLIV_14855
	3363621	1.01481	+	A	SLIV_14860
	3372637	1070.34	+	C	SLIV_14895
	3373049	0.544576	+	P	SLIV_14895
	3373575	1.85039	+	P	SLIV_14900
	3375403	-18.2913	-	P	SLIV_14915
	3375927	-0.291001	-	P	SLIV_14920
	3379206	-0.470234	-	S	SLIV_14940
	3379410	-0.828194	-	P	SLIV_14940
	3381175	-93.1979	-	N	-
	3383148	0.738577	+	P	SLIV_14960
	3383501	0.537193	+	S	SLIV_14960
	3396988	-214.18	-	P	SLIV_15025
	3398345	-42.202	-	P	SLIV_15030
	3400574	-32.9358	-	P	SLIV_15035
	3401479	-6.14055	-	C	SLIV_15040
	3404784	-162.765	-	P	SLIV_15060
	3408798	-32.187	-	P	SLIV_15065
	3412496	-3.70078	-	S	SLIV_15070
	3412742	-1.9922	-	S	SLIV_15070
	3412828	-1239.23	-	P	SLIV_15070
	3413352	-32.2026	-	P	SLIV_15075
	3414027	-57.2905	-	C	SLIV_15075
	3416232	-57.8391	-	P	SLIV_15090
	3417066	-19.2888	-	P	SLIV_15095
	3417638	-29.9288	-	P	SLIV_15100
	3418662	-17.6614	-	P	SLIV_15105
	3419095	-0.62681	-	P	SLIV_t15110
	3420693	70.1431	+	P	SLIV_15115
	3427589	-0.477618	-	P	SLIV_15155
	3428608	-104.841	-	P	SLIV_15165
	3428875	-1524.36	-	P	SLIV_t15170
	3428951	-2.70124	-	S	SLIV_t15175
	3428994	-2009.42	-	P	SLIV_t15175
	3431432	0.582001	+	P	SLIV_15185
	3431630	-0.522426	-	P	SLIV_15190
	3434716	-84.655	-	P	SLIV_t15195
	3435566	-2.26105	-	P	SLIV_15205
	3435614	19.2577	+	P	SLIV_15200
	3438036	-2.08181	-	P	SLIV_15220
	3453703	2.20096	+	P	SLIV_15290
	3457021	4.59796	+	P	SLIV_15300
	3463880	-0.477618	-	P	SLIV_15340
	3465834	-0.768618	-	P	SLIV_15350
	3468509	-0.910427	-	C	SLIV_15355
	3468857	-0.291001	-	N	-
	3468963	-0.343192	-	N	-
	3469761	-1.26889	-	P	SLIV_15365
	3472294	-0.343192	-	A	SLIV_15370
	3472575	16.2655	+	P	SLIV_15370
	3476734	0.828194	+	P	SLIV_15385
	3476744	-0.425426	-	P	SLIV_15390
	3488976	2.32801	+	A	SLIV_15430
	3489773	0.686385	+	A	SLIV_15435
	3494692	4.34439	+	P	SLIV_15460
	3509308	-0.291001	-	P	SLIV_15530
	3511035	1.46977	+	A	SLIV_15535
	3526608	-2.25366	-	A	SLIV_15640
	3531434	0.432809	+	C	SLIV_15670
	3534292	0.634193	+	P	SLIV_15685
	3535160	0.559851	+	P	SLIV_15695
	3538935	-0.291001	-	A	SLIV_15720
	3539169	-1.62685	-	A	SLIV_15725
	3539658	-81.8567	-	P	SLIV_15730
	3547880	1.83562	+	C	SLIV_15750
	3548188	1375.39	+	P	SLIV_15750
	3555549	-10.0221	-	P	SLIV_15785
	3556974	-2.55943	-	C	SLIV_15785
	3557234	-16.7576	-	P	SLIV_15790
	3558990	-1.71596	-	P	SLIV_15805
	3559061	-1.43285	-	S	SLIV_15805
	3564281	-0.679002	-	P	SLIV_15835
	3564616	1.29054	+	P	SLIV_15830
	3568257	0.970002	+	A	SLIV_15845
	3578446	-22.3258	-	P	SLIV_15900
	3584244	-3.84309	-	P	SLIV_15925
	3587379	16.7477	+	P	SLIV_15935
	3597119	-2.67171	-	N	-
	3597157	1.72436	+	P	SLIV_16000
	3618412	-0.537193	-	A	SLIV_16120
	3635000	-0.634193	-	A	SLIV_16215
	3635614	-372.414	-	P	SLIV_16220
	3635858	-1.57466	-	C	SLIV_16220
	3638020	1.78343	+	C	SLIV_16235
	3646554	-4.70184	-	P	SLIV_16255
	3650806	-0.395384	-	P	SLIV_16285
	3659624	3.43243	+	C	SLIV_16310
	3659882	-0.522426	-	P	SLIV_16315
	3659905	15.5587	+	P	SLIV_16310
	3664698	0.64896	+	P	SLIV_16330
	3672631	-0.835577	-	P	SLIV_16375
	3672825	0.492385	+	N	-
	3684148	-0.903044	-	P	SLIV_16435
	3690477	3.6496	+	N	-
	3693916	0.753852	+	P	SLIV_16475
	3696533	-0.432809	-	P	SLIV_16490
	3696682	82.8896	+	N	-
	3709799	-2.74605	-	P	SLIV_16545
	3723043	4.65117	+	P	SLIV_16595
	3723109	1.25413	+	S	SLIV_16595
	3723217	-0.380618	-	P	SLIV_16600
	3732463	-5.94604	-	P	SLIV_16660
	3736379	-2.72339	-	P	SLIV_16690
	3737693	-0.537193	-	S	SLIV_16695
	3737829	-4.55163	-	P	SLIV_16695
	3743295	-2.21675	-	P	SLIV_16725
	3743610	2.84406	+	P	SLIV_16720
	3745379	0.664235	+	P	SLIV_16730
	3752252	-0.380618	-	C	SLIV_16745
	3754509	1.9395	+	P	SLIV_16755
	3781250	-188.985	-	P	SLIV_16915
	3782945	-2.22362	-	C	SLIV_16915
	3783210	-139.045	-	P	SLIV_16920
	3783837	-15.5295	-	P	SLIV_16925
	3785468	-13.2969	-	C	SLIV_16930
	3795704	-1.93262	-	P	SLIV_16985
	3797405	0.388001	+	A	SLIV_16990
	3801224	180.385	+	P	SLIV_17010
	3819418	1.3137	+	P	SLIV_17085
	3822193	-20.229	-	P	SLIV_17100
	3822796	1.17928	+	A	SLIV_17100
	3823790	-2.51513	-	P	SLIV_17105
	3825241	-0.335809	-	P	SLIV_17110
	3831088	7.03722	+	P	SLIV_17120
	3832142	31.8408	+	P	SLIV_17130
	3844026	1.73862	+	P	SLIV_17175
	3845801	-1.86515	-	P	SLIV_t17185
	3847308	11.5372	+	P	SLIV_17190
	3848712	0.880894	+	P	SLIV_17200
	3851621	-0.664235	-	P	SLIV_17215
	3854857	-0.903044	-	S	SLIV_17230
	3855023	-125.931	-	P	SLIV_17230
	3855075	11.7001	+	N	-
	3857161	1.24624	+	P	SLIV_17235
	3857189	-4.65754	-	P	SLIV_17240
	3860476	0.671618	+	P	SLIV_17255
	3860843	8.78272	+	P	SLIV_17260
	3865204	4.19316	+	P	SLIV_17290
	3867800	-2.30586	-	P	SLIV_17315
	3869406	-21.935	-	P	SLIV_17330
	3869454	52.0489	+	P	SLIV_17320
	3879683	-13.9558	-	P	SLIV_17385
	3880405	-1.01481	-	P	SLIV_17390
	3891408	27.3299	+	P	SLIV_17445
	3900216	27.3536	+	A	SLIV_17515
	3900814	2.29796	+	A	SLIV_17520
	3901059	1.41758	+	A	SLIV_17520
	3906210	-1.25311	-	C	SLIV_17555
	3906539	-0.335809	-	P	SLIV_17560
	3915870	-0.335809	-	N	-
	3916418	-0.709043	-	P	SLIV_17615
	3930526	333.239	+	P	SLIV_17670
	3933610	78.9834	+	P	SLIV_17685
	3935848	-0.388001	-	P	SLIV_17705
	3936067	0.806044	+	P	SLIV_17700
	3936391	0.492385	+	S	SLIV_17700
	3940063	-1.01481	-	P	SLIV_17725
	3941969	1.52985	+	P	SLIV_17730
	3956642	-25.4097	-	N	-
	3957043	-2.89473	-	P	SLIV_17790
	3971546	-1.49981	-	N	-
	3971855	-4.45615	-	N	-
	3978808	-2.05177	-	P	SLIV_17860
	3979938	-20.271	-	C	SLIV_17860
	3981683	-10.0959	-	P	SLIV_t17870
	3988943	-47.2844	-	P	SLIV_t17915
	3992992	-1.08915	-	C	SLIV_17925
	3993869	-0.432809	-	P	SLIV_17935
	3996209	935.932	+	P	SLIV_t17945
	3996319	2.46243	+	P	SLIV_t17950
	3996416	281.307	+	P	SLIV_t17955
	4000560	1.76866	+	P	SLIV_17960
	4000678	8.61825	+	P	SLIV_t17965
	4001436	-130.769	-	P	SLIV_17970
	4001478	0.335809	+	N	-
	4001866	-2.49196	-	P	SLIV_17975
	4004599	1.98481	+	S	SLIV_17980
	4004732	6.53644	+	P	SLIV_17980
	4004826	-0.716427	-	S	SLIV_17990
	4005083	-1.8509	-	P	SLIV_17990
	4005123	128.946	+	P	SLIV_17985
	4005349	0.343192	+	S	SLIV_17985
	4005427	0.291001	+	S	SLIV_17985
	4008016	0.335809	+	A	SLIV_18000
	4012740	-0.582001	-	S	SLIV_18030
	4012951	-20.1027	-	P	SLIV_18030
	4012989	6.67137	+	P	SLIV_18025
	4015940	-1.29104	-	P	SLIV_18040
	4017105	3788.82	+	P	SLIV_18045
	4017186	1.53724	+	S	SLIV_18045
	4017260	27.5195	+	P	SLIV_t18050
	4021191	1430.08	+	P	SLIV_t18075
	4021192	-1.14185	-	P	SLIV_18080
	4026179	-0.470234	-	P	SLIV_18095
	4030030	-927.775	-	P	SLIV_18110
	4030282	596.429	+	P	SLIV_t18105
	4030301	-2.10447	-	S	SLIV_18110
	4045253	3.00064	+	P	SLIV_18190
	4045878	-0.880385	-	P	SLIV_18200
	4047191	0.716427	+	P	SLIV_18205
	4048497	300.285	+	P	SLIV_t18220
	4049125	19.219	+	P	SLIV_18230
	4051390	-0.962619	-	P	SLIV_18245
	4051413	19.2794	+	P	SLIV_18240
	4071090	-6.18688	-	P	SLIV_18345
	4071472	-2.68596	-	S	SLIV_18345
	4074208	-371.318	-	P	SLIV_t18360
	4074472	-648.174	-	P	SLIV_t18365
	4081794	-0.738577	-	P	SLIV_18390
	4084669	-13.9125	-	P	SLIV_18400
	4088128	-25.2422	-	P	SLIV_t18420
	4089902	-8.74631	-	P	SLIV_18435
	4095185	14.0719	+	P	SLIV_18450
	4096736	-19.5561	-	C	SLIV_18460
	4100323	6.94659	+	P	SLIV_18470
	4101949	0.589385	+	P	SLIV_18480
	4102937	1.26839	+	P	SLIV_18485
	4108686	0.470234	+	P	SLIV_18510
	4110329	0.567235	+	P	SLIV_18515
	4111210	-2.59686	-	P	SLIV_18525
	4111212	0.485001	+	P	SLIV_18520
	4119918	0.432809	+	P	SLIV_18565
	4127343	-0.768618	-	P	SLIV_18590
	4130162	-3.67277	-	P	SLIV_18600
	4134385	1.552	+	P	SLIV_18610
	4135551	1.82773	+	P	SLIV_18615
	4142133	-8.49961	-	P	SLIV_18645
	4142514	-0.522426	-	P	SLIV_18650
	4145039	1.71596	+	S	SLIV_18665
	4145060	3.20788	+	P	SLIV_18665
	4146740	0.887769	+	P	SLIV_18675
	4150651	-3.0592	-	P	SLIV_18705
	4150689	21.321	+	P	SLIV_18700
	4153731	-1.85777	-	N	-
	4155161	-0.425426	-	S	SLIV_18720
	4155519	-24.3723	-	P	SLIV_18720
	4155534	0.291001	+	P	SLIV_18715
	4156002	-37.438	-	P	SLIV_18725
	4156260	-0.716427	-	P	SLIV_18730
	4156982	-77.8647	-	P	SLIV_18735
	4157273	-11.2742	-	C	SLIV_18735
	4157960	1.84351	+	P	SLIV_18740
	4159138	0.955236	+	P	SLIV_18745
	4160224	-0.395384	-	P	SLIV_18755
	4160273	6.34982	+	P	SLIV_18750
	4161813	-3.5083	-	P	SLIV_18760
	4166826	58.2497	+	P	SLIV_18770
	4168806	-1.38804	-	P	SLIV_18785
	4168847	40.0847	+	P	SLIV_18780
	4175428	0.664235	+	P	SLIV_18795
	4180330	-2.28421	-	P	SLIV_18825
	4180365	49.2516	+	P	SLIV_18820
	4181246	-13.1793	-	P	SLIV_18830
	4182243	-1.81347	-	P	SLIV_18835
	4184562	-0.574618	-	S	SLIV_18845
	4184620	-21.4149	-	P	SLIV_18845
	4187203	-30.8545	-	N	-
	4189804	4.12722	+	P	SLIV_18865
	4190288	6.49163	+	N	-
	4190536	1.11919	+	N	-
	4192940	4.94752	+	P	SLIV_18875
	4195044	1.11919	+	C	SLIV_18890
	4197148	1.14185	+	P	SLIV_18890
	4198498	-0.440193	-	A	SLIV_18895
	4200711	1255.16	+	P	SLIV_t18905
	4200714	-0.291001	-	S	SLIV_18910
	4200920	-0.753852	-	P	SLIV_18910
	4201021	-0.432809	-	S	SLIV_18910
	4202353	5.85744	+	P	SLIV_18915
	4212772	1060.07	+	C	SLIV_18960
	4218052	-0.664235	-	P	SLIV_18985
	4218061	4.56792	+	P	SLIV_18980
	4219729	0.709043	+	P	SLIV_18990
	4220711	-30.7399	-	P	SLIV_19000
	4220769	8.76694	+	P	SLIV_18995
	4224852	1.05962	+	P	SLIV_19025
	4227068	-9.47649	-	P	SLIV_19035
	4227107	0.596768	+	N	-
	4231666	-1.73124	-	P	SLIV_19050
	4233215	-0.917811	-	C	SLIV_19055
	4233661	0.395384	+	N	-
	4233749	3098.69	+	P	SLIV_t19060
	4257971	-1.22409	-	P	SLIV_19175
	4258011	2.51564	+	P	SLIV_19170
	4263267	1.53036	+	C	SLIV_19195
	4266632	-2.56681	-	S	SLIV_19210
	4266988	-35.2233	-	P	SLIV_19210
	4267012	12.6706	+	P	SLIV_19205
	4269554	-15.2369	-	P	SLIV_19225
	4274688	1.4107	+	P	SLIV_19245
	4277175	-0.783385	-	P	SLIV_19270
	4277251	-0.291001	-	S	SLIV_19270
	4278475	-2.34277	-	P	SLIV_19275
	4279260	0.470234	+	A	SLIV_19275
	4281158	-6.52218	-	P	SLIV_19280
	4281875	2.76081	+	N	-
	4281903	-5.37295	-	P	SLIV_19285
	4284109	-4.60636	-	P	SLIV_19300
	4286690	11.9079	+	P	SLIV_19305
	4293055	0.72381	+	P	SLIV_19325
	4293842	-2.68596	-	P	SLIV_19335
	4294019	0.440193	+	P	SLIV_19330
	4294464	0.388001	+	N	-
	4296181	-15.4994	-	P	SLIV_19345
	4300107	1.164	+	P	SLIV_19350
	4322922	-1.74651	-	A	SLIV_19460
	4323436	-0.806044	-	P	SLIV_19465
	4323773	-7.54438	-	P	SLIV_19470
	4324246	-1.32796	-	C	SLIV_19470
	4328017	2.20886	+	P	SLIV_19485
	4330303	1.11181	+	P	SLIV_19490
	4346796	0.343192	+	C	SLIV_19565
	4347092	152.317	+	P	SLIV_19565
	4360169	-0.447576	-	S	SLIV_19650
	4360255	-0.470234	-	S	SLIV_19650
	4360310	-69.1664	-	P	SLIV_19650
	4373888	-0.955236	-	A	SLIV_19715
	4373964	-0.485001	-	A	SLIV_19715
	4405408	-1159.22	-	P	SLIV_t19905
	4405977	3.2616	+	C	SLIV_19910
	4407124	-1.08228	-	P	SLIV_19920
	4407146	2.037	+	P	SLIV_19915
	4411035	-4.11347	-	P	SLIV_19935
	4416016	-3.88688	-	A	SLIV_19945
	4419283	3.11139	+	P	SLIV_19960
	4420637	0.582001	+	P	SLIV_19965
	4424035	6.52218	+	C	SLIV_19985
	4424420	15.6664	+	P	SLIV_19985
	4427269	2.66534	+	P	SLIV_19990
	4427928	4.77567	+	P	SLIV_19995
	4429837	3.96326	+	P	SLIV_20005
	4437075	1.02958	+	P	SLIV_20040
	4438223	8.57751	+	P	SLIV_20045
	4440458	4.30493	+	P	SLIV_20055
	4457782	0.738577	+	C	SLIV_20150
	4459126	20.7697	+	P	SLIV_20150
	4461353	0.537193	+	P	SLIV_20170
	4462869	-1.85828	-	P	SLIV_20185
	4468993	-0.291001	-	A	SLIV_20205
	4469040	0.634193	+	P	SLIV_20205
	4472803	4.11933	+	P	SLIV_20225
	4477985	0.970002	+	P	SLIV_20245
	4486545	1.04485	+	P	SLIV_20280
	4501936	-2.35805	-	S	SLIV_t20370
	4501991	-10.2894	-	P	SLIV_t20370
	4504641	-0.291001	-	P	SLIV_20390
	4507294	1.87305	+	C	SLIV_20395
	4507798	2.89575	+	P	SLIV_20395
	4508239	0.72381	+	A	SLIV_20400
	4511079	0.574618	+	P	SLIV_20415
	4514085	-1.7017	-	P	SLIV_20435
	4518107	-0.395384	-	A	SLIV_20450
	4521906	-10.2117	-	P	SLIV_20470
	4530244	-16.5063	-	P	SLIV_20495
	4531636	557.81	+	N	-
	4538688	0.634193	+	A	SLIV_20535
	4539170	0.291001	+	A	SLIV_20535
	4540554	1.11919	+	N	-
	4541010	178.364	+	P	SLIV_20540
	4541546	32.1195	+	P	SLIV_20545
	4547296	0.477618	+	C	SLIV_20570
	4550273	31.8044	+	P	SLIV_20570
	4556781	0.925194	+	P	SLIV_20585
	4556921	257.539	+	P	SLIV_t20590
	4567285	-0.485001	-	P	SLIV_20660
	4567559	0.343192	+	P	SLIV_20655
	4576828	-1.35062	-	P	SLIV_20710
	4579078	0.343192	+	A	SLIV_20720
	4580324	-126.742	-	P	SLIV_20725
	4585750	4.05237	+	P	SLIV_20745
	4588008	6.11992	+	P	SLIV_20750
	4588592	-0.798152	-	P	SLIV_20760
	4588756	1.06751	+	P	SLIV_20755
	4588864	0.335809	+	S	SLIV_20755
	4589694	1.90258	+	A	SLIV_20765
	4614358	6.03183	+	P	SLIV_20880
	4615452	0.477618	+	P	SLIV_20890
	4617104	2.86571	+	C	SLIV_20905
	4619654	-2.53677	-	P	SLIV_20910
	4619702	128.591	+	P	SLIV_20905
	4620210	1.27628	+	A	SLIV_20910
	4629839	-0.79866	-	P	SLIV_20935
	4632302	0.485001	+	P	SLIV_20940
	4633702	-0.432809	-	P	SLIV_20960
	4633942	1.33585	+	P	SLIV_20955
	4640514	-0.440193	-	C	SLIV_21000
	4648084	0.440193	+	P	SLIV_21025
	4656179	0.388001	+	P	SLIV_21060
	4664911	-6.90967	-	C	SLIV_21110
	4665344	2.09658	+	N	-
	4676427	121.017	+	P	SLIV_21155
	4678412	-0.477618	-	P	SLIV_21175
	4680078	-6.00714	-	P	SLIV_21180
	4682813	1.52985	+	P	SLIV_21190
	4683007	0.84296	+	C	SLIV_21195
	4683061	-0.753852	-	A	SLIV_21195
	4686557	-36.0551	-	A	SLIV_21210
	4691321	0.432809	+	P	SLIV_21225
	4694424	0.62681	+	P	SLIV_21240
	4700219	-3.96428	-	P	SLIV_21270
	4704048	-1.39594	-	P	SLIV_21280
	4705507	-23.2826	-	P	SLIV_21285
	4706569	-0.335809	-	P	SLIV_21290
	4708922	2.48509	+	P	SLIV_21295
	4719717	1.57415	+	N	-
	4737207	-0.440193	-	P	SLIV_21415
	4756126	3.89528	+	P	SLIV_21515
	4799946	0.335809	+	P	SLIV_21545
	4802487	-0.84296	-	P	SLIV_21560
	4802513	-0.388001	-	S	SLIV_21560
	4802656	0.574618	+	P	SLIV_21555
	4807534	2.51513	+	P	SLIV_21580
	4808929	1.72385	+	P	SLIV_21590
	4810680	-0.380618	-	P	SLIV_21605
	4812738	-1.20143	-	C	SLIV_21605
	4830500	0.477618	+	C	SLIV_21680
	4831786	21.9979	+	P	SLIV_21680
	4840419	-4.88845	-	P	SLIV_21720
	4844530	-1.05224	-	P	SLIV_21740
	4846770	-17.4598	-	P	SLIV_21755
	4848543	-1.97743	-	P	SLIV_21765
	4853472	5.03663	+	P	SLIV_21770
	4859861	259.858	+	P	SLIV_t21810
	4862053	0.828194	+	P	SLIV_21815
	4867799	1.66428	+	P	SLIV_21850
	4874578	0.52981	+	P	SLIV_21865
	4896637	1.00004	+	P	SLIV_21965
	4898604	14.0065	+	P	SLIV_21970
	4905386	0.589385	+	P	SLIV_22000
	4905943	1.18615	+	C	SLIV_22010
	4909903	-0.813427	-	P	SLIV_22035
	4914700	3.20152	+	P	SLIV_22045
	4915940	-9.74101	-	P	SLIV_22060
	4916695	-32.6822	-	P	SLIV_22065
	4917818	-0.470234	-	P	SLIV_22070
	4919430	-1.37277	-	S	SLIV_t22075
	4919472	-119.09	-	P	SLIV_t22075
	4919791	0.544576	+	A	SLIV_22080
	4920041	0.485001	+	A	SLIV_22080
	4927054	1.18666	+	P	SLIV_22110
	4933092	3.38813	+	P	SLIV_22135
	4937209	0.343192	+	S	SLIV_22140
	4937227	-4.14835	-	P	SLIV_22145
	4937269	2.75343	+	P	SLIV_22140
	4945348	0.537193	+	P	SLIV_22180
	4949160	5.69297	+	P	SLIV_22195
	4949969	5.27696	+	P	SLIV_22200
	4951517	130.974	+	P	SLIV_22205
	4953708	2.81301	+	P	SLIV_22220
	4953943	0.388001	+	S	SLIV_22220
	4955584	14.1124	+	P	SLIV_22225
	4961083	115.771	+	P	SLIV_t22245
	4965772	158.098	+	P	SLIV_22280
	4967500	-10.5066	-	P	SLIV_22300
	4972006	21.3978	+	P	SLIV_22310
	4980331	-7.56602	-	P	SLIV_22355
	4982010	8.8782	+	P	SLIV_22360
	4983272	-15.8737	-	P	SLIV_22375
	4984897	-2.64854	-	C	SLIV_22375
	4994034	1.26839	+	C	SLIV_22430
	4996226	4.14249	+	P	SLIV_22430
	4998972	5.87322	+	P	SLIV_22440
	5002142	2.49247	+	P	SLIV_22455
	5005553	-0.790769	-	P	SLIV_22470
	5007370	-1.164	-	P	SLIV_22475
	5009253	-1.95477	-	P	SLIV_22480
	5009311	-0.72381	-	S	SLIV_22480
	5009621	0.82081	+	A	SLIV_22480
	5011599	0.731193	+	A	SLIV_22485
	5020366	-0.485001	-	N	-
	5020812	3.93908	+	N	-
	5020931	0.537193	+	N	-
	5021360	16.4857	+	P	SLIV_22525
	5026827	0.380618	+	P	SLIV_22535
	5035386	3.26058	+	C	SLIV_22580
	5036913	156.157	+	P	SLIV_22580
	5039999	3.26847	+	P	SLIV_22595
	5058378	1.75339	+	C	SLIV_22665
	5059244	100.748	+	P	SLIV_22665
	5060264	0.910427	+	P	SLIV_22670
	5062307	0.738577	+	N	-
	5068400	0.582001	+	C	SLIV_22705
	5073489	12.264	+	P	SLIV_22705
	5083247	-0.335809	-	P	SLIV_22760
	5095372	0.499768	+	N	-
	5101097	-0.440193	-	P	SLIV_22825
	5107372	0.537193	+	P	SLIV_22830
	5109909	23.3221	+	P	SLIV_22840
	5111126	9.76519	+	P	SLIV_22845
	5111176	-1.78394	-	P	SLIV_22850
	5113307	22.8488	+	P	SLIV_22860
	5115154	-1.08228	-	N	-
	5115297	-0.343192	-	P	SLIV_22875
	5115551	172277	+	N	-
	5118275	0.783385	+	C	SLIV_22885
	5130604	1.8509	+	P	SLIV_22930
	5133061	-182.248	-	N	-
	5135185	10.057	+	C	SLIV_22945
	5135569	139.631	+	P	SLIV_22945
	5135947	1.12658	+	S	SLIV_22945
	5162955	11.5746	+	P	SLIV_23060
	5165686	-0.537193	-	P	SLIV_23075
	5165848	-0.432809	-	S	SLIV_23075
	5168218	0.574618	+	P	SLIV_23080
	5168278	-0.395384	-	N	-
	5168898	-0.70166	-	P	SLIV_23090
	5169572	0.343192	+	N	-
	5172210	19.0092	+	P	SLIV_23095
	5175219	2.52939	+	P	SLIV_23115
	5175966	4.83524	+	P	SLIV_23120
	5177792	18.0273	+	P	SLIV_23125
	5178449	2.65643	+	C	SLIV_23135
	5179790	15.5172	+	P	SLIV_23140
	5180947	-6.73247	-	P	SLIV_23150
	5184225	105.481	+	P	SLIV_23160
	5184753	-0.485001	-	A	SLIV_23165
	5185090	38.5368	+	P	SLIV_23165
	5185597	3.41716	+	P	SLIV_23170
	5186212	-49.5824	-	P	SLIV_t23180
	5186304	-29.2281	-	P	SLIV_23185
	5186344	0.962619	+	P	SLIV_23175
	5187672	44.4729	+	P	SLIV_23195
	5199179	-6.36408	-	P	SLIV_23250
	5200708	-0.716427	-	A	SLIV_23255
	5201111	-0.828194	-	P	SLIV_23265
	5207566	-17.4094	-	P	SLIV_23295
	5210056	-1.05224	-	P	SLIV_23300
	5217385	0.962619	+	P	SLIV_23335
	5232243	4.82786	+	P	SLIV_23440
	5236279	-3.9849	-	P	SLIV_23470
	5236360	2.78296	+	P	SLIV_23465
	5240535	-24.6607	-	P	SLIV_t23480
	5243841	-15.3482	-	P	SLIV_t23500
	5244891	-14.2664	-	P	SLIV_23510
	5248737	1.26889	+	P	SLIV_23530
	5253340	0.380618	+	P	SLIV_23555
	5253355	-1.54462	-	N	-
	5253398	-3365.51	-	N	-
	5256675	28.7948	+	P	SLIV_t23575
	5256974	1.28315	+	S	SLIV_t23575
	5271635	-0.544576	-	P	SLIV_23645
	5282146	0.380618	+	A	SLIV_23685
	5286407	-1798.97	-	P	SLIV_t23705
	5286588	-0.873002	-	P	SLIV_23710
	5287431	1.90996	+	N	-
	5289117	0.492385	+	A	SLIV_23720
	5290117	-10.6267	-	P	SLIV_23730
	5302513	-8.65033	-	P	SLIV_23780
	5319429	-0.559851	-	P	SLIV_23850
	5321061	4.22422	+	P	SLIV_23855
	5337892	10.5297	+	P	SLIV_23920
	5346049	-4.55163	-	P	SLIV_23965
	5350050	0.522426	+	P	SLIV_23985
	5350174	0.432809	+	S	SLIV_23985
	5351529	367.772	+	P	SLIV_23990
	5351563	-20.3303	-	N	-
	5361174	-1.8952	-	P	SLIV_24045
	5367607	1.07439	+	P	SLIV_24060
	5371599	-3.50678	-	P	SLIV_24075
	5372692	1.17877	+	P	SLIV_24080
	5373253	5.45416	+	P	SLIV_24085
	5387223	8.84128	+	P	SLIV_24145
	5390846	-5.37396	-	P	SLIV_24175
	5404453	-3.12667	-	P	SLIV_t24245
	5404574	-0.432809	-	C	SLIV_t24245
	5418085	4.40294	+	P	SLIV_24290
	5426599	-0.641577	-	P	SLIV_24320
	5428123	-0.425426	-	P	SLIV_24330
	5448704	0.955236	+	P	SLIV_24400
	5449038	-0.522426	-	P	SLIV_24410
	5451334	-1.28366	-	A	SLIV_24420
	5451561	0.604151	+	P	SLIV_24420
	5462845	-21.1934	-	P	SLIV_24475
	5463024	1.14924	+	A	SLIV_24475
	5470324	-0.634193	-	P	SLIV_24500
	5473921	-295.655	-	P	SLIV_24510
	5473964	3.73922	+	P	SLIV_24505
	5474934	0.432809	+	N	-
	5477380	0.910427	+	P	SLIV_24520
	5479653	9.63561	+	P	SLIV_24530
	5485754	3.71605	+	P	SLIV_24560
	5485787	-7.55227	-	P	SLIV_t24565
	5485965	0.291001	+	S	SLIV_24560
	5486103	4.49256	+	P	SLIV_t24570
	5486265	1.20881	+	C	SLIV_24575
	5487746	74.2075	+	P	SLIV_24575
	5488837	-0.485001	-	A	SLIV_24585
	5489481	63.4471	+	P	SLIV_24585
	5490935	-10.1244	-	P	SLIV_24595
	5494792	1.92524	+	P	SLIV_24600
	5497628	15.5674	+	P	SLIV_24615
	5498919	4.83474	+	P	SLIV_24620
	5504405	2.36594	+	P	SLIV_24640
	5506539	2.99962	+	P	SLIV_24645
	5507958	0.335809	+	N	-
	5508320	-0.999536	-	P	SLIV_24660
	5508535	-0.910427	-	S	SLIV_24660
	5508550	0.335809	+	P	SLIV_24655
	5515189	1.97743	+	P	SLIV_24675
	5520750	0.790769	+	C	SLIV_24690
	5521137	6.07359	+	P	SLIV_24690
	5521451	38.3413	+	P	SLIV_24695
	5525952	0.335809	+	P	SLIV_24710
	5528810	3.03068	+	P	SLIV_24715
	5528841	-0.955236	-	P	SLIV_24720
	5530710	-1.40332	-	P	SLIV_24725
	5544634	-0.425426	-	A	SLIV_24760
	5546530	-2.93216	-	C	SLIV_24765
	5546807	0.947344	+	P	SLIV_24770
	5547832	0.910427	+	P	SLIV_24780
	5549688	3.0592	+	P	SLIV_24785
	5550918	3.61116	+	P	SLIV_24795
	5550996	82.5166	+	P	SLIV_t24800
	5551731	1.07439	+	P	SLIV_24810
	5551812	8.07419	+	P	SLIV_t24815
	5551852	1.10443	+	S	SLIV_t24815
	5558281	4.44979	+	P	SLIV_24830
	5566587	-92.1092	-	P	SLIV_24870
	5567016	-0.64896	-	C	SLIV_24870
	5569185	38.7041	+	P	SLIV_24875
	5569275	0.738577	+	S	SLIV_24875
	5571348	1.23885	+	P	SLIV_24880
	5575830	-0.865619	-	P	SLIV_24900
	5577684	0.641577	+	C	SLIV_24910
	5579887	1.01481	+	P	SLIV_24915
	5596137	-1.12658	-	P	SLIV_24990
	5606516	0.925194	+	C	SLIV_25045
	5608252	-0.619426	-	N	-
	5608295	2.55256	+	P	SLIV_25045
	5610781	0.589385	+	P	SLIV_25060
	5615596	0.477618	+	P	SLIV_25080
	5616833	0.858235	+	P	SLIV_25085
	5621017	0.432809	+	P	SLIV_25100
	5623121	-1.32847	-	P	SLIV_25115
	5626215	-0.619426	-	S	SLIV_25145
	5626377	-0.806044	-	P	SLIV_25145
	5626508	10.8144	+	P	SLIV_25140
	5631371	116.136	+	P	SLIV_25165
	5643163	-0.447576	-	P	SLIV_25205
	5686528	1987.68	+	P	SLIV_t25385
	5686606	2121.93	+	P	SLIV_t25390
	5686878	4.78254	+	P	SLIV_t25395
	5708073	-641.228	-	P	SLIV_25475
	5752666	-3.44822	-	P	SLIV_25665
	5753947	-1.38066	-	P	SLIV_25670
	5764936	2.12662	+	P	SLIV_25715
	5767791	0.72381	+	N	-
	5770552	-29.2836	-	P	SLIV_25750
	5771990	-24.2142	-	P	SLIV_25755
	5772270	-2.25366	-	P	SLIV_25760
	5774400	-0.641577	-	P	SLIV_25770
	5782207	0.335809	+	A	SLIV_25815
	5785124	1.31319	+	P	SLIV_25825
	5788366	1.97743	+	C	SLIV_25835
	5788845	52.6805	+	P	SLIV_25835
	5789423	1.05962	+	P	SLIV_25840
	5790193	53.1391	+	P	SLIV_25845
	5792185	6.30603	+	P	SLIV_25855
	5804335	233.177	+	P	SLIV_t25910
	5804354	-0.291001	-	P	SLIV_25915
	5805673	1.08915	+	P	SLIV_25925
	5808929	-82.9563	-	P	SLIV_25945
	5809057	1.71545	+	A	SLIV_25945
	5810102	6.26122	+	N	-
	5811860	0.709043	+	P	SLIV_25955
	5816993	-2.41813	-	P	SLIV_25985
	5817158	0.806044	+	P	SLIV_25980
	5837050	-0.731193	-	A	SLIV_26075
	5841156	0.440193	+	S	SLIV_26075
	5841322	7.85014	+	P	SLIV_26075
	5844026	0.335809	+	A	SLIV_26100
	5853306	-0.343192	-	P	SLIV_26145
	5853929	-4.10405	-	P	SLIV_26150
	5853976	0.485001	+	P	SLIV_26140
	5854842	-0.388001	-	C	SLIV_26150
	5856788	-0.977386	-	P	SLIV_26165
	5857005	1.42496	+	A	SLIV_26165
	5867195	-0.52981	-	S	SLIV_26205
	5867312	-70.9059	-	P	SLIV_26205
	5870047	0.641577	+	P	SLIV_26215
	5877224	-0.440193	-	A	SLIV_26255
	5877639	12196.4	+	P	SLIV_26255
	5881553	-5.30548	-	P	SLIV_26285
	5884486	6.22532	+	S	SLIV_26290
	5884792	17.1469	+	P	SLIV_26290
	5891729	-0.582001	-	P	SLIV_26330
	5904728	-23.026	-	P	SLIV_26390
	5909611	0.291001	+	P	SLIV_26415
	5914254	-1.23147	-	P	SLIV_26430
	5916271	-1.67166	-	P	SLIV_26440
	5921275	0.977386	+	P	SLIV_26460
	5929162	-0.440193	-	P	SLIV_26505
	5933401	0.567235	+	P	SLIV_26525
	5934336	-0.291001	-	A	SLIV_26530
	5934955	-0.380618	-	P	SLIV_26535
	5935550	0.291001	+	P	SLIV_26530
	5935709	-1.71647	-	P	SLIV_26540
	5943249	0.843469	+	P	SLIV_26565
	5960076	-2.44766	-	P	SLIV_26635
	5961705	-4.66339	-	P	SLIV_26640
	5969444	-0.291001	-	P	SLIV_26680
	5971206	0.84296	+	P	SLIV_26690
	5975774	-17.4371	-	P	SLIV_26725
	5975818	0.813427	+	P	SLIV_26715
	5978014	-14.6801	-	P	SLIV_26735
	5979197	-85.2018	-	P	SLIV_26745
	5994546	-79.0824	-	P	SLIV_26805
	5996403	-1.56728	-	P	SLIV_26810
	6006455	2.77609	+	P	SLIV_26850
	6009274	0.432809	+	C	SLIV_26870
	6010189	1.73862	+	P	SLIV_26870
	6010578	2.85832	+	P	SLIV_26875
	6015887	-28.7197	-	P	SLIV_26895
	6021246	0.485001	+	P	SLIV_26915
	6025865	11.5721	+	P	SLIV_26935
	6027173	-4.47678	-	P	SLIV_26945
	6028598	6.37936	+	P	SLIV_26950
	6032214	122.309	+	P	SLIV_26965
	6033595	7.09375	+	C	SLIV_26975
	6040404	-1.843	-	P	SLIV_27005
	6041918	8.6483	+	P	SLIV_27015
	6056452	20.8586	+	P	SLIV_27075
	6057513	0.485001	+	P	SLIV_27080
	6063571	-0.55196	-	P	SLIV_27120
	6070306	-3.61167	-	P	SLIV_27140
	6070345	33.8472	+	P	SLIV_27130
	6070627	-1.44024	-	S	SLIV_27140
	6081408	1.05224	+	P	SLIV_27190
	6082480	0.582001	+	P	SLIV_27195
	6084355	49.1277	+	N	-
	6087092	3.24531	+	C	SLIV_27220
	6087526	11.3943	+	P	SLIV_27220
	6092554	-11.2673	-	C	SLIV_27235
	6093668	3.57373	+	C	SLIV_27245
	6106717	10.1776	+	P	SLIV_27290
	6108624	-0.395384	-	A	SLIV_27300
	6110218	2.50724	+	C	SLIV_27315
	6111928	-4.97018	-	P	SLIV_27325
	6111973	0.432809	+	P	SLIV_27320
	6115161	-19.1898	-	C	SLIV_27325
	6121560	0.447576	+	N	-
	6122097	-16.0313	-	P	SLIV_27365
	6123841	-15.9246	-	P	SLIV_27370
	6130778	3.60581	+	P	SLIV_27385
	6150243	0.388001	+	P	SLIV_27495
	6153098	2.0892	+	P	SLIV_27520
	6165785	0.477618	+	P	SLIV_27575
	6172133	8.2081	+	P	SLIV_27585
	6186190	4.7166	+	P	SLIV_27640
	6186406	-25.8143	-	P	SLIV_t27645
	6187255	-12.7457	-	P	SLIV_27655
	6187300	15.7428	+	P	SLIV_27650
	6191780	-26.9281	-	P	SLIV_27675
	6191828	2.37332	+	N	-
	6207011	-0.388001	-	C	SLIV_27720
	6207489	5.76731	+	C	SLIV_27725
	6209124	18.9733	+	P	SLIV_27725
	6212351	2.74605	+	P	SLIV_27750
	6224620	0.291001	+	S	SLIV_27825
	6224758	0.992152	+	P	SLIV_27825
	6231830	-0.806044	-	P	SLIV_27870
	6232887	-9.49915	-	P	SLIV_27875
	6240250	9.54981	+	C	SLIV_27900
	6247931	0.858235	+	P	SLIV_27925
	6257704	2.37332	+	P	SLIV_27970
	6262125	112.638	+	P	SLIV_27980
	6264285	126.598	+	P	SLIV_27990
	6264647	121.449	+	P	SLIV_27995
	6265214	3.37286	+	P	SLIV_28000
	6268839	-2.84305	-	P	SLIV_28020
	6268879	5.35029	+	P	SLIV_28015
	6275960	0.731193	+	C	SLIV_28045
	6276822	2.52201	+	P	SLIV_28045
	6289686	50.1428	+	P	SLIV_28120
	6290087	0.425426	+	P	SLIV_28125
	6291737	36.7119	+	P	SLIV_28135
	6295500	-0.470234	-	S	SLIV_28175
	6295826	-26.2677	-	P	SLIV_28175
	6301745	40.5239	+	P	SLIV_28185
	6338534	3.73234	+	P	SLIV_28365
	6340438	-124.488	-	P	SLIV_28380
	6341871	-2.25366	-	P	SLIV_28390
	6349173	0.619426	+	A	SLIV_28420
	6349567	0.343192	+	A	SLIV_28420
	6355510	-0.432809	-	P	SLIV_28450
	6366728	-1.39543	-	C	SLIV_28480
	6375368	44.7011	+	P	SLIV_28520
	6386245	-0.522426	-	P	SLIV_28595
	6390245	0.515043	+	P	SLIV_28605
	6391198	-0.432809	-	P	SLIV_28615
	6391644	-21.1888	-	P	SLIV_28620
	6391664	0.671618	+	P	SLIV_28610
	6392818	-0.432809	-	P	SLIV_28630
	6398866	7.59122	+	P	SLIV_28650
	6401345	0.873002	+	P	SLIV_28660
	6408653	2.35168	+	P	SLIV_28690
	6414068	253.419	+	P	SLIV_28720
	6415915	1.02219	+	P	SLIV_28730
	6416484	1.72385	+	P	SLIV_28735
	6417510	0.380618	+	P	SLIV_28740
	6418248	-68.1863	-	P	SLIV_28750
	6418879	-3.75348	-	P	SLIV_28755
	6420756	5.35767	+	P	SLIV_28760
	6420986	20.0958	+	N	-
	6441963	-0.380618	-	P	SLIV_28855
	6444362	0.582001	+	C	SLIV_28860
	6450274	3.8963	+	P	SLIV_28875
	6450685	1.44024	+	C	SLIV_28880
	6455493	15.7604	+	P	SLIV_28900
	6463917	0.977386	+	P	SLIV_28950
	6472661	-0.485001	-	S	SLIV_29000
	6472695	-0.62681	-	S	SLIV_29000
	6472953	-4.82099	-	P	SLIV_29000
	6472988	0.813427	+	P	SLIV_28995
	6491421	-1.17928	-	A	SLIV_29080
	6522111	0.492385	+	P	SLIV_29235
	6523061	-0.963127	-	P	SLIV_29250
	6545309	-1916.6	-	P	SLIV_t29360
	6546994	1.09704	+	P	SLIV_29365
	6547348	1086.11	+	P	SLIV_29370
	6548269	0.522426	+	P	SLIV_29375
	6549345	0.567235	+	P	SLIV_29385
	6558146	0.291001	+	P	SLIV_29425
	6560563	-0.477618	-	P	SLIV_29440
	6569814	11.3457	+	P	SLIV_29460
	6576339	0.343192	+	P	SLIV_29485
	6578116	-1.32796	-	P	SLIV_29500
	6580595	40.1072	+	P	SLIV_29505
	6582407	3.01439	+	P	SLIV_29510
	6582899	31.3662	+	P	SLIV_29515
	6585057	16.3144	+	P	SLIV_29525
	6588835	47.5446	+	P	SLIV_29540
	6589933	0.761235	+	P	SLIV_29545
	6590417	57.5606	+	P	SLIV_29550
	6593324	0.619426	+	C	SLIV_29575
	6593648	0.52981	+	P	SLIV_29575
	6594657	2.6269	+	P	SLIV_29580
	6597717	-0.291001	-	N	-
	6600996	3.64171	+	P	SLIV_29605
	6610390	5.44729	+	P	SLIV_29640
	6627519	-1.05224	-	P	SLIV_29720
	6628237	19.9151	+	C	SLIV_29725
	6629060	12.4545	+	P	SLIV_29725
	6629370	13.8878	+	P	SLIV_29730
	6635902	0.917811	+	P	SLIV_29755
	6638026	-2.79875	-	S	SLIV_29770
	6638092	-5.63543	-	P	SLIV_29770
	6659813	0.604151	+	P	SLIV_29875
	6665327	41.219	+	P	SLIV_29900
	6668179	1.05962	+	C	SLIV_29930
	6671145	3.23207	+	P	SLIV_29940
	6673347	3.64808	+	C	SLIV_29955
	6681560	1.19404	+	N	-
	6681910	8.71627	+	C	SLIV_29980
	6683337	0.343192	+	P	SLIV_29985
	6683361	-17.0267	-	P	SLIV_t29990
	6683459	-820.968	-	P	SLIV_t29995
	6683564	-2.64166	-	P	SLIV_t30000
	6683641	-51.154	-	P	SLIV_t30005
	6683752	-44.0027	-	P	SLIV_t30010
	6687282	0.738577	+	P	SLIV_30025
	6688516	6.49062	+	P	SLIV_30040
	6690519	3.60378	+	P	SLIV_30055
	6690633	41.4886	+	P	SLIV_t30060
	6698287	16.4305	+	P	SLIV_t30100
	6703283	-0.70166	-	N	-
	6703319	26.8484	+	P	SLIV_30120
	6703376	-0.291001	-	A	SLIV_30125
	6703964	-0.291001	-	P	SLIV_30130
	6714242	37.5617	+	P	SLIV_30170
	6717287	1.85879	+	P	SLIV_30190
	6719216	1.35062	+	P	SLIV_30195
	6723633	1.00004	+	P	SLIV_30210
	6723633	-1.14924	-	P	SLIV_30215
	6725045	-1.38804	-	P	SLIV_30220
	6728102	7.58078	+	P	SLIV_30230
	6728948	1.24624	+	P	SLIV_30235
	6730534	17.9214	+	C	SLIV_30245
	6731332	257.829	+	P	SLIV_30245
	6737728	0.619426	+	P	SLIV_30270
	6746060	2.88735	+	C	SLIV_30315
	6747158	6.09625	+	P	SLIV_30320
	6756129	5.18098	+	P	SLIV_30355
	6758323	0.492385	+	P	SLIV_30365
	6758704	26.3202	+	P	SLIV_30370
	6759729	360.363	+	P	SLIV_30380
	6766864	0.291001	+	P	SLIV_30405
	6779216	0.589385	+	P	SLIV_30455
	6780748	1.85828	+	P	SLIV_30460
	6787849	-2.55994	-	P	SLIV_30500
	6799950	12.3368	+	C	SLIV_30550
	6812269	1.00743	+	C	SLIV_30615
	6815855	0.432809	+	P	SLIV_30625
	6819400	5.69348	+	P	SLIV_30645
	6821254	-208.672	-	P	SLIV_30660
	6821656	-1.20143	-	P	SLIV_30665
	6829714	0.388001	+	P	SLIV_30695
	6834739	0.440193	+	P	SLIV_30715
	6852717	0.291001	+	P	SLIV_30765
	6856958	0.62681	+	P	SLIV_30785
	6861505	0.806044	+	P	SLIV_30795
	6865158	6.82795	+	C	SLIV_r30815
	6867095	0.499768	+	P	SLIV_r30815
	6870464	3.31328	+	P	SLIV_r30825
	6871269	0.843469	+	P	SLIV_30830
	6876307	1.4629	+	P	SLIV_30850
	6877007	1.46977	+	P	SLIV_30855
	6878341	1.73124	+	P	SLIV_30865
	6879256	0.559851	+	P	SLIV_30870
	6881328	45.9623	+	C	SLIV_30885
	6884335	0.671618	+	P	SLIV_30885
	6887358	-0.641577	-	N	-
	6895866	3.65749	+	P	SLIV_30945
	6905019	-0.828702	-	C	SLIV_30995
	6936330	-1.16349	-	P	SLIV_31155
	6938337	-0.343192	-	P	SLIV_31160
	6945206	-0.515043	-	P	SLIV_31195
	6971205	-0.686385	-	P	SLIV_31325
	6971309	-0.335809	-	S	SLIV_31325
	6977277	-5.74669	-	P	SLIV_31340
	7006748	1.07439	+	P	SLIV_31475
	7013697	-2.75394	-	P	SLIV_31520
	7027568	0.761235	+	P	SLIV_31590
	7029888	0.515043	+	P	SLIV_31610
	7044988	-0.388001	-	N	-
	7045525	-28.5575	-	P	SLIV_31680
	7047722	-5.96233	-	C	SLIV_31685
	7053876	-7.95453	-	P	SLIV_31725
	7055087	-0.596768	-	P	SLIV_31730
	7060179	5.68661	+	P	SLIV_31750
	7072970	58.5428	+	P	SLIV_31815
	7073222	1.00743	+	P	SLIV_31820
	7075203	-0.388001	-	S	SLIV_31835
	7075298	-0.567235	-	P	SLIV_31835
	7101809	-9.29241	-	P	SLIV_31930
	7104935	-0.291001	-	P	SLIV_31940
	7105536	1.00794	+	A	SLIV_31940
	7110128	1.69381	+	P	SLIV_31955
	7114867	2.18671	+	P	SLIV_31970
	7114963	1.45551	+	S	SLIV_31970
	7123307	-6.20165	-	P	SLIV_32020
	7123502	0.343192	+	P	SLIV_32015
	7124367	0.634193	+	S	SLIV_32025
	7124474	0.686385	+	P	SLIV_32025
	7125440	-0.477618	-	P	SLIV_32035
	7129803	1.358	+	P	SLIV_32045
	7143865	0.72381	+	N	-
	7178117	1.73862	+	P	SLIV_32275
	7178798	2.82727	+	N	-
	7186805	-0.62681	-	P	SLIV_32325
	7193776	4.6639	+	P	SLIV_32360
	7194177	-2.81301	-	P	SLIV_32370
	7194827	0.947344	+	P	SLIV_32365
	7198522	42.8089	+	P	SLIV_32390
	7204644	-2.68647	-	P	SLIV_32425
	7235757	1.32109	+	P	SLIV_32550
	7287005	0.343192	+	P	SLIV_32780
	7299270	-0.380618	-	A	SLIV_32840
	7300204	1.11919	+	P	SLIV_32845
	7308510	1.552	+	P	SLIV_32890
	7317890	-0.380618	-	P	SLIV_32940
	7317955	0.380618	+	P	SLIV_32935
	7320472	0.671618	+	P	SLIV_32950
	7336137	-0.634193	-	A	SLIV_33020
	7336804	-1.58943	-	P	SLIV_33025
	7337421	-0.731193	-	A	SLIV_33030
	7346604	-1.20143	-	P	SLIV_33075
	7348452	-0.574618	-	P	SLIV_33080
	7366551	-0.291001	-	P	SLIV_33155
	7387382	0.873002	+	P	SLIV_33240
	7392359	-6.73298	-	P	SLIV_33275
	7395134	2.44817	+	P	SLIV_33280
	7404802	0.612043	+	P	SLIV_33320
	7407627	21.4264	+	P	SLIV_33335
	7440360	-0.612043	-	S	SLIV_33510
	7440648	-0.865619	-	P	SLIV_33510
	7442688	0.343192	+	P	SLIV_33515
	7456351	0.485001	+	P	SLIV_33580
	7467622	0.887769	+	P	SLIV_33640
	7472951	-6.50003	-	P	SLIV_33665
	7533402	-8.30409	-	P	SLIV_33975
	7547847	-0.395384	-	S	SLIV_34055
	7548111	-7.19533	-	P	SLIV_34055
	7566174	49.1093	+	P	SLIV_34120
	7566446	6.67876	+	S	SLIV_34120
	7575457	-14.6768	-	P	SLIV_34165
	7590059	6.51531	+	P	SLIV_34230
	7593264	1.82085	+	P	SLIV_34250
	7599584	0.388001	+	P	SLIV_34280
	7610456	1.76815	+	P	SLIV_34340
	7626812	-0.74596	-	A	SLIV_34410
	7627529	7.6956	+	P	SLIV_34410
	7627559	-1.164	-	P	SLIV_34415
	7633191	0.567235	+	P	SLIV_34445
	7647568	-0.477618	-	P	SLIV_34535
	7647887	23.0502	+	P	SLIV_34530
	7648274	1.02958	+	S	SLIV_34530
	7685008	1.49981	+	P	SLIV_34715
	7688814	-0.343192	-	A	SLIV_34730
	7689604	-1.28366	-	S	SLIV_34735
	7689867	-8.59509	-	P	SLIV_34735
	7695243	-5.07456	-	C	SLIV_34760
	7699042	2.10447	+	C	SLIV_34795
	7702492	-34.2869	-	N	-
	7723590	-0.537193	-	P	SLIV_34905
	7724521	-0.52981	-	P	SLIV_34910
	7731674	-10.1924	-	P	SLIV_34945
	7732589	-1.84988	-	P	SLIV_34950
	7746101	0.432809	+	P	SLIV_35025
	7746182	0.425426	+	S	SLIV_35025
	7756651	-1.00743	-	A	SLIV_35080
	7766699	0.440193	+	P	SLIV_35125
	7770264	3.10502	+	P	SLIV_35140
	7787904	0.70166	+	P	SLIV_35210
	7812619	943.774	+	P	SLIV_35310
	7812669	0.380618	+	S	SLIV_35310
	7812927	3.00752	+	S	SLIV_35310
	7861321	2.09709	+	A	SLIV_35500
	7939337	-0.738577	-	P	SLIV_35880
	7941885	-0.858235	-	P	SLIV_35900
	7945370	0.574618	+	P	SLIV_35915
	7975421	-1.5963	-	P	SLIV_36040
	8020701	-0.388001	-	P	SLIV_36215
	8046616	-0.477618	-	P	SLIV_36305
	8078762	-0.52981	-	A	SLIV_36425
	8080345	0.574618	+	A	SLIV_36430
	8080399	0.492385	+	A	SLIV_36430
	8080643	-0.544576	-	P	SLIV_36435
	8115367	-259.816	-	P	SLIV_36575
	8133296	-0.388001	-	A	SLIV_36665
	8133729	-0.343192	-	S	SLIV_36670
	8133947	-4.40193	-	P	SLIV_36670
	8135140	-18.0785	-	C	SLIV_36670
	8135537	1.11919	+	C	SLIV_36675
	8138226	0.335809	+	P	SLIV_36680
	8139942	-0.768618	-	P	SLIV_36695
	8150935	3.74762	+	N	-
	8151039	-0.380618	-	P	SLIV_36760
	8156124	-1.6047	-	S	SLIV_36790
	8156393	-4.90271	-	P	SLIV_36790
	8162519	0.335809	+	A	SLIV_36820
	8177427	0.432809	+	P	SLIV_36875
	8186393	0.559851	+	A	SLIV_36920
	8221979	-0.425426	-	P	SLIV_37100
	8259996	68.28	+	P	SLIV_37270
	8260230	2.17932	+	S	SLIV_37270
	8260511	0.544576	+	A	SLIV_37275
	8260638	0.335809	+	A	SLIV_37275
	8283843	-0.783385	-	P	SLIV_37325
	8283890	0.992661	+	P	SLIV_37320
	8283950	-0.335809	-	S	SLIV_37325
